# Supplementary material for: Cost-effectiveness of bariatric surgery and non-surgical weight management programmes for adults with severe obesity: a decision analysis model
Source: PubMed Central journal article supplement (PMC8455321; doi:10.1038/s41366-021-00849-8), 2021-06-04
Supplement: 41366_2021_849_MOESM1_ESM.pdf [file 41366_2021_849_MOESM1_ESM.pdf]

# Technical Appendix

## Technical Appendix

### Contents

|                                  |                                     |
|----------------------------------|-------------------------------------|
| Data inputs                      | 3                                   |
| UKHF microsimulation methodology | 41                                  |
| UKHF tool methodology            | <b>Error! Bookmark not defined.</b> |
| References                       | 56                                  |

## Data inputs

### Epidemiological data

#### Population data

Demographic data was collected for England, Scotland, Wales and Northern Ireland. Information was collected on the age and sex distribution of the population, and the distribution of deaths by age and sex.

The data were processed as text files, in a format suitable for inclusion in the microsimulation programme. The data sources were as follows

Table 1: Population data sources by geography

| Demography                      | Geography | Source                                                                                                                                                                                                                           |
|---------------------------------|-----------|----------------------------------------------------------------------------------------------------------------------------------------------------------------------------------------------------------------------------------|
| Total population by age and sex | UK        | ONS. Population Estimates for UK, England and Wales, Scotland and Northern Ireland: mid-2015. 2016.(1)                                                                                                                           |
| Deaths by age and sex           | UK        | ONS. Deaths registered in England and Wales 2015. 2016 (2)<br>National Records of Scotland. Deaths, by sex and single year of age, Scotland 1974 to 2016. 2017 (3)<br>NISRA. Deaths by single year of age, 1955 to 2015, 2017(4) |

### Disease data

A number of obesity-related diseases were modelled (see Table 2). The list of diseases modelled for obesity was determined after a review of the literature conducted for the WRAP study (5)(Table 2).

**Table 2: Characteristics of diseases modelled**

|                            | Duration | Terminal | Age category |
|----------------------------|----------|----------|--------------|
| Cardiovascular outcomes    |          |          |              |
| CHD                        | Chronic  | Yes      | Adult        |
| Diabetes Mellitus (Type 2) | Chronic  | No       | Adult        |
| Hypertension               | Chronic  | No       | Adult        |
| Stroke                     | Chronic  | Yes      | Adult        |
| Cancer and other outcomes  |          |          |              |

|                     |         |     |                                        |
|---------------------|---------|-----|----------------------------------------|
| Breast cancer       | Chronic | Yes | Adult (post menopause<br>  women only) |
| Colorectal cancer   | Chronic | Yes | Adult                                  |
| Endometrial cancer  | Chronic | Yes | Adult<br>(Female only)                 |
| Knee Osteoarthritis | Chronic | No  | Adult                                  |
| Kidney cancer       | Chronic | Yes | Adult                                  |
| Lung cancer         | Chronic | Yes | Adult                                  |
| Oesophageal cancer  | Chronic | Yes | Adult                                  |
| Ovarian cancer      | Chronic | Yes | Adult<br>(Female only)                 |
| Pancreatic cancer   | Chronic | Yes | Adult                                  |

All diseases were lifelong, chronic diseases, so once acquired, were prevalent for the duration of an individual's life. Individuals could develop more than one diseases, but these were considered independent of one another. All diseases apart from diabetes, hypertension and knee osteoarthritis were terminal. Epidemiological data on each disease's incidence, prevalence, mortality and survival was collected (see Table 3). When a parameter, e.g. Survival was not available from the literature or national statistics, this was computed – see Module two: Microsimulation model section Approximating missing disease statistics for methods.

**Summary of data sources**

Table 3: Summary of disease data sources

| Diseases           | Incidence                                                          | Prevalence                                      | Mortality                                 | Survival                                                                                          | Relative Risk                                   |
|--------------------|--------------------------------------------------------------------|-------------------------------------------------|-------------------------------------------|---------------------------------------------------------------------------------------------------|-------------------------------------------------|
| Breast cancer      | ONS, Cancer registration statistics, 2015                          | NA                                              | ONS, Cancer registration statistics, 2015 | ONS, Cancer survival in England: Patients diagnosed between 2010 and 2014 and followed up to 2015 | World Obesity Federation (DYNAMO project)       |
| CHD                | Computed from Prevalence and Mortality                             | BHF, Cardiovascular Disease Statistics 2014 (6) | CVD statistics, 2017                      | Computed from prevalence and mortality                                                            | World Obesity Federation (DYNAMO project)       |
| Colorectal cancer  | ONS, Cancer registration statistics, 2015                          | NA                                              | ONS, Cancer registration statistics, 2015 | ONS, Cancer survival in England: Patients diagnosed between 2010 and 2014 and followed up to 2015 | World Obesity Federation (DYNAMO project)       |
| Diabetes           | Personal communication with Dr Craig Curry from Cardiff University | International Diabetes Federation, 2012         | Non-terminal                              | Non-terminal                                                                                      | Derived from PREVEND data (Jaccard 2015 et al.) |
| Endometrial cancer | ONS, Cancer registration statistics, 2015                          | NA                                              | ONS, Cancer registration statistics, 2015 | ONS, Cancer survival in England: Patients diagnosed between                                       | World Obesity Federation (DYNAMO project)       |

Technical Appendix

|                     |                                           |                                             |                                           |                                                                                                   |                                           |
|---------------------|-------------------------------------------|---------------------------------------------|-------------------------------------------|---------------------------------------------------------------------------------------------------|-------------------------------------------|
|                     |                                           |                                             |                                           | 2010 and 2014 and followed up to 2015                                                             |                                           |
| Hypertension        | Derived from Prevalence                   | Health survey for England, 2015             | Non-terminal                              | Non-terminal                                                                                      | World Obesity Federation (DYNAMO project) |
| Knee Osteoarthritis | Derived from prevalence                   | Arthritis UK Musculoskeletal calculator (7) | Non-terminal                              | Non-terminal                                                                                      | Zheng et al (2015) (8)                    |
| Oesophageal cancer  | ONS, Cancer registration statistics, 2015 | NA                                          | ONS, Cancer registration statistics, 2015 | ONS, Cancer survival in England: Patients diagnosed between 2010 and 2014 and followed up to 2015 | World Obesity Federation (DYNAMO project) |
| Ovarian cancer      | ONS, Cancer registration statistics, 2015 | NA                                          | ONS, Cancer registration statistics, 2015 | ONS, Cancer survival in England: Patients diagnosed between 2010 and 2014 and followed up to 2015 | World Obesity Federation (DYNAMO project) |
| Pancreatic cancer   | ONS, Cancer registration statistics, 2015 | NA                                          | ONS, Cancer registration statistics, 2015 | ONS, Cancer survival in England: Patients diagnosed between 2010 and 2014 and followed up to 2015 | World Obesity Federation (DYNAMO project) |
| Kindney cancer      | ONS, Cancer registration statistics, 2015 | NA                                          | ONS, Cancer registration statistics, 2015 | ONS, Cancer survival in England: Patients diagnosed between                                       | World Obesity Federation (DYNAMO project) |

Technical Appendix

|        |                                 |                                                 |                                                                           |                                        |                                                |
|--------|---------------------------------|-------------------------------------------------|---------------------------------------------------------------------------|----------------------------------------|------------------------------------------------|
|        |                                 |                                                 |                                                                           | 2010 and 2014 and followed up to 2015  |                                                |
| Stroke | BHF, stroke statistics 2009 (9) | BHF, Cardiovascular Disease Statistics 2014 (6) | ONS, Deaths Registrations Summary Statistics, England and Wales, 2015 (2) | Computed from prevalence and mortality | World Obesity Federation (DYNAMO project) (10) |

## Incidence, Prevalence, Mortality data by disease

### Breast cancer

Prevalence data was not available on breast cancer data, but the model does not require the input of prevalence, only of incidence, so this parameter was not required.

**Table 4: Breast cancer epidemiological data (per 100,000 population)**

| Incidence                                     |      |        | Prevalence                                        |      |        | Mortality                                     |      |        |
|-----------------------------------------------|------|--------|---------------------------------------------------|------|--------|-----------------------------------------------|------|--------|
| ONS, Cancer registration statistics, 2015(11) |      |        | Prevalence is not a required input into the model |      |        | ONS, Cancer registration statistics, 2015(11) |      |        |
| ICD 10: C50                                   |      |        | N/A                                               |      |        | ICD 10: C50                                   |      |        |
| Age group                                     | Male | Female | Age group                                         | Male | Female | Age group                                     | Male | Female |
| 0-49                                          | N/A  | N/A    | N/A                                               | N/A  | N/A    | 0-49                                          | N/A  | N/A    |
| 50-54                                         | N/A  | 279.4  | N/A                                               | N/A  | N/A    | 50-54                                         | N/A  | 35.7   |
| 55-59                                         | N/A  | 277.0  | N/A                                               | N/A  | N/A    | 55-59                                         | N/A  | 42.0   |
| 60-64                                         | N/A  | 342.2  | N/A                                               | N/A  | N/A    | 60-64                                         | N/A  | 48.4   |
| 65-69                                         | N/A  | 418.8  | N/A                                               | N/A  | N/A    | 65-69                                         | N/A  | 60.7   |
| 70-74                                         | N/A  | 373.6  | N/A                                               | N/A  | N/A    | 70-74                                         | N/A  | 76.6   |
| 75-79                                         | N/A  | 399.6  | N/A                                               | N/A  | N/A    | 75-79                                         | N/A  | 119.3  |
| 80-84                                         | N/A  | 453.0  | N/A                                               | N/A  | N/A    | 80-84                                         | N/A  | 166.4  |
| 85-89                                         | N/A  | 476.0  | N/A                                               | N/A  | N/A    | 85-89                                         | N/A  | 224.4  |
| 90+                                           | N/A  | 451.0  | N/A                                               | N/A  | N/A    | 90+                                           | N/A  | 340.4  |

### Coronary heart disease (CHD)

**Table 5: CHD epidemiological data (per 100,000 population)**

| Incidence               |        |        | Prevalence            |         |        | Mortality       |       |        |
|-------------------------|--------|--------|-----------------------|---------|--------|-----------------|-------|--------|
| Smolina et al. 2012(12) |        |        | BHF CVD Stats 2014(6) |         |        | ONS 2015(2)     |       |        |
| ICD 10: I21-I22         |        |        | ICD 10: I21           |         |        | ICD 10: I21-I22 |       |        |
| Age group               | Male   | Female | Age group             | Male    | Female | Age group       | Male  | Female |
| 0-29                    | 0.0    | 0.0    | 0-44                  | 60.0    | 30.0   | <1              | 0.0   | 0.3    |
| 30-54                   | 88.1   | 21.2   | 45-54                 | 1070.0  | 430.0  | 1-4             | 0.0   | 0.0    |
| 55-64                   | 317.0  | 90.3   | 55-64                 | 4510.0  | 1240.0 | 5-9             | 0.0   | 0.0    |
| 65-74                   | 533.0  | 237.0  | 65-74                 | 8660.0  | 2960.0 | 15-24           | 0.1   | 0.0    |
| 75-84                   | 1017.0 | 597.0  | 75+                   | 14780.0 | 6960.0 | 25-34           | 0.8   | 0.2    |
| 85+                     | 1987.0 | 1395.0 |                       |         |        | 35-44           | 4.9   | 1.4    |
|                         |        |        |                       |         |        | 45-54           | 21.2  | 5.2    |
|                         |        |        |                       |         |        | 55-64           | 52.2  | 14.2   |
|                         |        |        |                       |         |        | 65-74           | 109.4 | 44.6   |
|                         |        |        |                       |         |        | 75-84           | 281.0 | 146.0  |



|  |  |     |       |       |
|--|--|-----|-------|-------|
|  |  | 85+ | 692.0 | 454.7 |
|--|--|-----|-------|-------|

**Colorectal cancer**

Prevalence data was not available on colorectal cancer data, but the model does not require the input of prevalence, only of incidence, so this parameter was not required.

**Table 6: Colorectal cancer epidemiological data (per 100,000 population)**

| Incidence                                     |       |        | Prevalence                                        |      |        | Mortality                                     |       |        |
|-----------------------------------------------|-------|--------|---------------------------------------------------|------|--------|-----------------------------------------------|-------|--------|
| ONS, Cancer registration statistics, 2015(11) |       |        | Prevalence is not a required input into the model |      |        | ONS, Cancer registration statistics, 2015(11) |       |        |
| ICD 10: C18-C20                               |       |        | N/A                                               |      |        | ICD 10: C18-C20                               |       |        |
| Age group                                     | Male  | Female | Age group                                         | Male | Female | Age group                                     | Male  | Female |
| 0-9                                           | 0.0   | 0.0    | N/A                                               | N/A  | N/A    | 0-19                                          | 0.0   | 0.0    |
| 10-14                                         | 0.3   | 0.8    | N/A                                               | N/A  | N/A    | 20-24                                         | 0.3   | 0.8    |
| 15-19                                         | 1.6   | 2.2    | N/A                                               | N/A  | N/A    | 25-29                                         | 0.4   | 0.4    |
| 20-24                                         | 2.3   | 3.1    | N/A                                               | N/A  | N/A    | 30-34                                         | 1.5   | 1.2    |
| 25-29                                         | 2.3   | 2.7    | N/A                                               | N/A  | N/A    | 35-39                                         | 2.5   | 2.5    |
| 30-34                                         | 5.6   | 6.5    | N/A                                               | N/A  | N/A    | 40-44                                         | 4.0   | 2.7    |
| 35-39                                         | 9.1   | 10.7   | N/A                                               | N/A  | N/A    | 45-49                                         | 5.8   | 5.6    |
| 40-44                                         | 12.0  | 11.8   | N/A                                               | N/A  | N/A    | 50-54                                         | 12.7  | 10.2   |
| 45-49                                         | 23.2  | 21.5   | N/A                                               | N/A  | N/A    | 55-59                                         | 24.3  | 15.3   |
| 50-54                                         | 42.6  | 37.6   | N/A                                               | N/A  | N/A    | 60-64                                         | 40.3  | 23.7   |
| 55-59                                         | 84.2  | 61.8   | N/A                                               | N/A  | N/A    | 65-69                                         | 57.6  | 34.2   |
| 60-64                                         | 150.3 | 91.4   | N/A                                               | N/A  | N/A    | 70-74                                         | 87.9  | 53.7   |
| 65-69                                         | 196.1 | 118.2  | N/A                                               | N/A  | N/A    | 75-79                                         | 131.8 | 80.4   |
| 70-74                                         | 276.8 | 172.1  | N/A                                               | N/A  | N/A    | 80-84                                         | 213.3 | 139.8  |
| 75-79                                         | 373.8 | 235.6  | N/A                                               | N/A  | N/A    | 85-89                                         | 313.4 | 215.0  |
| 80-84                                         | 457.5 | 309.3  | N/A                                               | N/A  | N/A    | 90+                                           | 410.4 | 264.8  |
| 85-89                                         | 511.9 | 359.5  | N/A                                               | N/A  | N/A    |                                               |       |        |
| 90+                                           | 460.3 | 304.2  | N/A                                               | N/A  | N/A    |                                               |       |        |

## Diabetes Type 2

**Table 7: Diabetes type 2 incidence and prevalence estimates (per 100,000 population)**

| Incidence                                                         |      |        | Prevalence                            |          |          | Mortality    |
|-------------------------------------------------------------------|------|--------|---------------------------------------|----------|----------|--------------|
| Personal communication with Dr Curry from Cardiff University (13) |      |        | National Diabetes Audit 2015-2016(14) |          |          | Non-terminal |
| ICD 10 codes unknown                                              |      |        | ICD 10 codes unknown                  |          |          |              |
| Age group                                                         | Male | Female | Age group                             | Male     | Female   |              |
| 0-4                                                               | 56   | 53     | 0-4                                   | 1.999    | 2.727    |              |
| 5-9                                                               | 34   | 42     | 5-9                                   | 6.681    | 6.372    |              |
| 10-14                                                             | 43   | 40     | 10-14                                 | 15       | 19.285   |              |
| 15-19                                                             | 83   | 107    | 15-19                                 | 41.744   | 64.613   |              |
| 20-24                                                             | 75   | 145    | 20-24                                 | 85.329   | 160.621  |              |
| 25-29                                                             | 101  | 226    | 25-29                                 | 202.748  | 352.739  |              |
| 30-34                                                             | 150  | 242    | 30-34                                 | 561.584  | 684.461  |              |
| 35-39                                                             | 240  | 263    | 35-39                                 | 1361.296 | 1249.819 |              |
| 40-44                                                             | 355  | 333    | 40-44                                 | 2617.251 | 1898.323 |              |
| 45-49                                                             | 561  | 482    | 45-49                                 | 4338.317 | 2858.298 |              |
| 50-54                                                             | 820  | 636    | 50-54                                 | 6451.945 | 4227.206 |              |
| 55-59                                                             | 1068 | 847    | 55-59                                 | 9371.893 | 6188.7   |              |
| 60-64                                                             | 1316 | 965    | 60-64                                 | 11825.85 | 7780.135 |              |
| 65-69                                                             | 1516 | 1234   | 65-69                                 | 13621.13 | 9047.041 |              |
| 70-74                                                             | 1763 | 1378   | 70-74                                 | 16010.86 | 11196.63 |              |
| 75-79                                                             | 1677 | 1483   | 75-79                                 | 18065.24 | 13559.67 |              |
| 80-84                                                             | 1645 | 1336   | 80-84                                 | 18464.43 | 14217.44 |              |
| 85-89                                                             | 1300 | 1169   | 85+                                   | 15210.91 | 11513.66 |              |
| 90+                                                               | 546  | 440    |                                       |          |          |              |

### Endometrial cancer

Prevalence data was not available on endometrial cancer data, but the model does not require the input of prevalence, only of incidence, so this parameter was not required.

**Table 8: Endometrial cancer epidemiological data (per 100,000 population)**

| Incidence                                     |      |        | Prevalence                                        |      |        | Mortality                                     |      |        |
|-----------------------------------------------|------|--------|---------------------------------------------------|------|--------|-----------------------------------------------|------|--------|
| ONS, Cancer registration statistics, 2015(11) |      |        | Prevalence is not a required input into the model |      |        | ONS, Cancer registration statistics, 2015(11) |      |        |
| ICD 10: C33-C34                               |      |        | N/A                                               |      |        | ICD 10: C33-C34                               |      |        |
| Age group                                     | Male | Female | Age group                                         | Male | Female | Age group                                     | Male | Female |
| 0-24                                          | N/A  | 0.0    | N/A                                               | N/A  | N/A    | 0-29                                          | N/A  | 0.0    |
| 25-29                                         | N/A  | 0.8    | N/A                                               | N/A  | N/A    | 30-34                                         | N/A  | 0.1    |
| 30-34                                         | N/A  | 1.3    | N/A                                               | N/A  | N/A    | 35-39                                         | N/A  | 0.2    |
| 35-39                                         | N/A  | 2.2    | N/A                                               | N/A  | N/A    | 40-44                                         | N/A  | 0.7    |
| 40-44                                         | N/A  | 6.5    | N/A                                               | N/A  | N/A    | 45-49                                         | N/A  | 0.8    |
| 45-49                                         | N/A  | 11.7   | N/A                                               | N/A  | N/A    | 50-54                                         | N/A  | 1.1    |
| 50-54                                         | N/A  | 30.4   | N/A                                               | N/A  | N/A    | 55-59                                         | N/A  | 4.5    |
| 55-59                                         | N/A  | 52.0   | N/A                                               | N/A  | N/A    | 60-64                                         | N/A  | 8.9    |
| 60-64                                         | N/A  | 67.9   | N/A                                               | N/A  | N/A    | 65-69                                         | N/A  | 14.4   |
| 65-69                                         | N/A  | 82.7   | N/A                                               | N/A  | N/A    | 70-74                                         | N/A  | 19.2   |
| 70-74                                         | N/A  | 83.3   | N/A                                               | N/A  | N/A    | 75-79                                         | N/A  | 27.3   |
| 75-79                                         | N/A  | 90.6   | N/A                                               | N/A  | N/A    | 80-84                                         | N/A  | 32.8   |
| 80-84                                         | N/A  | 82.5   | N/A                                               | N/A  | N/A    | 85+                                           | N/A  | 33.2   |
| 85-89                                         | N/A  | 63.5   | N/A                                               | N/A  | N/A    |                                               |      |        |
| 90+                                           | N/A  | 34.4   | N/A                                               | N/A  | N/A    |                                               |      |        |

## Hypertension

**Table 9: Hypertension incidence and prevalence estimates (per 100,000 population)**

| Incidence               |       |        | Prevalence                                                                                                                |        |        | Mortality    |
|-------------------------|-------|--------|---------------------------------------------------------------------------------------------------------------------------|--------|--------|--------------|
| Derived from Prevalence |       |        | Health survey for England, 2015(15)                                                                                       |        |        | Non-terminal |
| ICD 10 codes unknown    |       |        | Defined in this survey as SBP at least 140mmHg or DBP at least 90mmHg or on medication prescribed to control hypertension |        |        |              |
| Age group               | Male  | Female | Age group                                                                                                                 | Male   | Female |              |
| 0-17                    | 0.9   | 3.8    | 0-15                                                                                                                      | 0.0    | 0.0    |              |
| 18-29                   | 98.1  | 9.0    | 16-24                                                                                                                     | 490.0  | 130.0  |              |
| 30-39                   | 62.2  | 73.7   | 25-34                                                                                                                     | 1090.0 | 150.0  |              |
| 40-49                   | 140.4 | 114.3  | 35-44                                                                                                                     | 1800.0 | 910.0  |              |
| 50-59                   | 274.2 | 360.0  | 45-54                                                                                                                     | 3170.0 | 2050.0 |              |
| 60-110                  | 10.3  | 42.7   | 55-64                                                                                                                     | 5000.0 | 3990.0 |              |
|                         |       |        | 65-74                                                                                                                     | 5870.0 | 5830.0 |              |
|                         |       |        | 75-110                                                                                                                    | 6160.0 | 7030.0 |              |

**Knee Osteoarthritis**

**Table 10: Knee Osteoarthritis incidence and prevalence estimates (per 100,000 population)**

| Incidence               |      |        | Prevalence            |       |        | Mortality    |
|-------------------------|------|--------|-----------------------|-------|--------|--------------|
| Derived from prevalence |      |        | Arthritis UK, 2016(7) |       |        | Non-terminal |
| ICD 10 codes unknown    |      |        | ICD 10 codes unknown  |       |        |              |
| Age group               | Male | Female | Age group             | Male  | Female |              |
| 0-17                    | 0.0  | 0.0    | 0-44                  | 0.0   | 0.0    |              |
| 18-29                   | 0.0  | 0.0    | 45-64                 | 169.5 | 202.0  |              |
| 30-39                   | 14.0 | 0.4    | 65-74                 | 173.4 | 209.4  |              |
| 40-49                   | 0.0  | 17.1   | 75+                   | 139.7 | 170.4  |              |
| 50-59                   | 0.0  | 0.0    |                       |       |        |              |
| 60-79                   | 0.0  | 0.0    |                       |       |        |              |
| 80+                     | 0.0  | 0.0    |                       |       |        |              |

**Renal cancer**

Prevalence data was not available on Renal cancer data, but the model does not require the input of prevalence, only of incidence, so this parameter was not required.

**Table 4: Renal cancer epidemiological data (per 100,000 population)**

| Incidence                                     |       |        | Prevalence                                        |      |        | Mortality                                     |      |        |
|-----------------------------------------------|-------|--------|---------------------------------------------------|------|--------|-----------------------------------------------|------|--------|
| ONS, Cancer registration statistics, 2015(11) |       |        | Prevalence is not a required input into the model |      |        | ONS, Cancer registration statistics, 2015(11) |      |        |
| ICD 10: C64-C68                               |       |        | N/A                                               |      |        | ICD 10: C64-C68                               |      |        |
| Age group                                     | Male  | Female | Age group                                         | Male | Female | Age group                                     | Male | Female |
| <1                                            | 2.1   | 1.9    | N/A                                               | N/A  | N/A    | <1                                            | 0.0  | 0.0    |
| 1-4                                           | 1.8   | 2.5    | N/A                                               | N/A  | N/A    | 1-4                                           | 0.0  | 0.2    |
| 5-9                                           | 0.5   | 0.7    | N/A                                               | N/A  | N/A    | 5-9                                           | 0.0  | 0.0    |
| 10-19                                         | 0.0   | 0.0    | N/A                                               | N/A  | N/A    | 10-19                                         | 0.0  | 0.0    |
| 20-24                                         | 0.2   | 0.4    | N/A                                               | N/A  | N/A    | 20-24                                         | 0.0  | 0.0    |
| 25-29                                         | 0.7   | 1.0    | N/A                                               | N/A  | N/A    | 25-29                                         | 0.0  | 0.0    |
| 30-34                                         | 1.3   | 0.8    | N/A                                               | N/A  | N/A    | 30-34                                         | 0.0  | 0.0    |
| 35-39                                         | 4.4   | 2.2    | N/A                                               | N/A  | N/A    | 35-39                                         | 0.6  | 0.3    |
| 40-44                                         | 0.9   | 4.3    | N/A                                               | N/A  | N/A    | 40-44                                         | 0.8  | 0.5    |
| 45-49                                         | 16.5  | 8.5    | N/A                                               | N/A  | N/A    | 45-49                                         | 3.4  | 1.7    |
| 50-54                                         | 23.9  | 11.4   | N/A                                               | N/A  | N/A    | 50-54                                         | 4.4  | 1.8    |
| 55-59                                         | 37.7  | 17.9   | N/A                                               | N/A  | N/A    | 55-59                                         | 9.8  | 3.1    |
| 60-64                                         | 55.0  | 23.6   | N/A                                               | N/A  | N/A    | 60-64                                         | 14.4 | 5.2    |
| 65-69                                         | 71.4  | 37.2   | N/A                                               | N/A  | N/A    | 65-69                                         | 23.5 | 11.2   |
| 70-74                                         | 89.1  | 42.7   | N/A                                               | N/A  | N/A    | 70-74                                         | 28.9 | 13.6   |
| 75-79                                         | 107.7 | 59.6   | N/A                                               | N/A  | N/A    | 75-79                                         | 45.6 | 23.2   |
| 80-84                                         | 118.1 | 60.7   | N/A                                               | N/A  | N/A    | 80-84                                         | 58.9 | 31.6   |
| 85-89                                         | 129.6 | 65.5   | N/A                                               | N/A  | N/A    | 85-89                                         | 81.6 | 37.9   |
| 90+                                           | 104.0 | 514.0  | N/A                                               | N/A  | N/A    | 90+                                           | 96.3 | 44.9   |

### Oesophageal cancer

Prevalence data was not available on Oesophageal cancer data, but the model does not require the input of prevalence, only of incidence, so this parameter was not required.

**Table 12: Oesophageal cancer incidence and prevalence estimates (per 100,000 population)**

| Incidence                                     |       |        | Prevalence                                        |      |        | Mortality                                     |       |        |
|-----------------------------------------------|-------|--------|---------------------------------------------------|------|--------|-----------------------------------------------|-------|--------|
| ONS, Cancer registration statistics, 2015(11) |       |        | Prevalence is not a required input into the model |      |        | ONS, Cancer registration statistics, 2015(11) |       |        |
| ICD 10 C15                                    |       |        | N/A                                               |      |        | ICD 10 C15                                    |       |        |
| Age group                                     | Male  | Female | Age group                                         | Male | Female | Age group                                     | Male  | Female |
| 0-4                                           | 0.0   | 0.0    | N/A                                               | N/A  | N/A    | 0-4                                           | 0.0   | 0.0    |
| 5-9                                           | 0.0   | 0.0    | N/A                                               | N/A  | N/A    | 5-9                                           | 0.0   | 0.0    |
| 10-14                                         | 0.0   | 0.0    | N/A                                               | N/A  | N/A    | 10-14                                         | 0.0   | 0.0    |
| 15-19                                         | 0.0   | 0.0    | N/A                                               | N/A  | N/A    | 15-19                                         | 0.0   | 0.0    |
| 20-24                                         | 0.0   | 0.0    | N/A                                               | N/A  | N/A    | 20-24                                         | 0.0   | 0.0    |
| 25-29                                         | 0.2   | 0.0    | N/A                                               | N/A  | N/A    | 25-29                                         | 0.0   | 0.0    |
| 30-34                                         | 0.4   | 0.0    | N/A                                               | N/A  | N/A    | 30-34                                         | 0.3   | 0.0    |
| 35-39                                         | 1.2   | 0.3    | N/A                                               | N/A  | N/A    | 35-39                                         | 0.7   | 0.2    |
| 40-44                                         | 2.2   | 1.1    | N/A                                               | N/A  | N/A    | 40-44                                         | 2.0   | 0.7    |
| 45-49                                         | 5.4   | 1.6    | N/A                                               | N/A  | N/A    | 45-49                                         | 4.2   | 1.1    |
| 50-54                                         | 12.7  | 3.9    | N/A                                               | N/A  | N/A    | 50-54                                         | 7.8   | 2.5    |
| 55-59                                         | 29    | 9.1    | N/A                                               | N/A  | N/A    | 55-59                                         | 21.3  | 4.8    |
| 60-64                                         | 44.8  | 13.3   | N/A                                               | N/A  | N/A    | 60-64                                         | 33.9  | 10.1   |
| 65-69                                         | 60.8  | 31.1   | N/A                                               | N/A  | N/A    | 65-69                                         | 51.6  | 12.6   |
| 70-74                                         | 86.7  | 27.6   | N/A                                               | N/A  | N/A    | 70-74                                         | 72.6  | 22.1   |
| 75-79                                         | 89.2  | 36.7   | N/A                                               | N/A  | N/A    | 75-79                                         | 77.6  | 32.4   |
| 80-84                                         | 106.9 | 51     | N/A                                               | N/A  | N/A    | 80-84                                         | 106.4 | 46.2   |
| 85-89                                         | 114.9 | 59.3   | N/A                                               | N/A  | N/A    | 85-89                                         | 119.7 | 69.3   |
| 90+                                           | 101.9 | 66.3   | N/A                                               | N/A  | N/A    | 90+                                           | 135.4 | 68.1   |

**Ovarian cancer**

Prevalence data was not available on Ovarian cancer data, but the model does not require the input of prevalence, only of incidence, so this parameter was not required.

**Table 13: Ovarian cancer incidence and prevalence estimates (per 100,000 population)**

| Incidence                                     |      |        | Prevalence                                        |      |        | Mortality                                     |      |        |
|-----------------------------------------------|------|--------|---------------------------------------------------|------|--------|-----------------------------------------------|------|--------|
| ONS, Cancer registration statistics, 2015(11) |      |        | Prevalence is not a required input into the model |      |        | ONS, Cancer registration statistics, 2015(11) |      |        |
| ICD 10 C56                                    |      |        |                                                   |      |        | ICD 10 C56                                    |      |        |
| Age group                                     | Male | Female | Age group                                         | Male | Female | Age group                                     | Male | Female |
| 0-4                                           | N/A  | 0.0    | N/A                                               | N/A  | N/A    | 0-19                                          | N/A  | 0.0    |
| 5-9                                           | N/A  | 0.2    | N/A                                               | N/A  | N/A    | 20-29                                         | N/A  | 0.3    |
| 10-14                                         | N/A  | 0.6    | N/A                                               | N/A  | N/A    | 30-34                                         | N/A  | 0.5    |
| 15-19                                         | N/A  | 1.6    | N/A                                               | N/A  | N/A    | 35-39                                         | N/A  | 1.0    |
| 20-24                                         | N/A  | 4.0    | N/A                                               | N/A  | N/A    | 40-44                                         | N/A  | 2.1    |
| 25-29                                         | N/A  | 5.0    | N/A                                               | N/A  | N/A    | 45-49                                         | N/A  | 3.9    |
| 30-34                                         | N/A  | 5.5    | N/A                                               | N/A  | N/A    | 50-54                                         | N/A  | 8.1    |
| 35-39                                         | N/A  | 8.2    | N/A                                               | N/A  | N/A    | 55-59                                         | N/A  | 12.6   |
| 40-44                                         | N/A  | 13.6   | N/A                                               | N/A  | N/A    | 60-64                                         | N/A  | 20.6   |
| 45-49                                         | N/A  | 19.9   | N/A                                               | N/A  | N/A    | 65-69                                         | N/A  | 33.8   |
| 50-54                                         | N/A  | 28.1   | N/A                                               | N/A  | N/A    | 70-74                                         | N/A  | 43.2   |
| 55-59                                         | N/A  | 36.6   | N/A                                               | N/A  | N/A    | 75-79                                         | N/A  | 58.4   |
| 60-64                                         | N/A  | 40.9   | N/A                                               | N/A  | N/A    | 80-84                                         | N/A  | 62.5   |
| 65-69                                         | N/A  | 56.5   | N/A                                               | N/A  | N/A    | 85-89                                         | N/A  | 71.1   |
| 70-74                                         | N/A  | 61.2   | N/A                                               | N/A  | N/A    | 90+                                           | N/A  | 59.5   |
| 75-79                                         | N/A  | 71.0   | N/A                                               | N/A  | N/A    |                                               |      |        |
| 80-84                                         | N/A  | 70.6   | N/A                                               | N/A  | N/A    |                                               |      |        |
| 85-89                                         | N/A  | 69.1   | N/A                                               | N/A  | N/A    |                                               |      |        |
| 90+                                           | N/A  | 53.8   | N/A                                               | N/A  | N/A    |                                               |      |        |



**Pancreatic cancer**

Prevalence data was not available on Pancreatic cancer data, but the model does not require the input of prevalence, only of incidence, so this parameter was not required.

**Table 14: Pancreatic cancer incidence and prevalence estimates (per 100,000 population)**

| Incidence                                     |       |        | Prevalence                                        |      |        | Mortality                                     |       |        |
|-----------------------------------------------|-------|--------|---------------------------------------------------|------|--------|-----------------------------------------------|-------|--------|
| ONS, Cancer registration statistics, 2015(11) |       |        | Prevalence is not a required input into the model |      |        | ONS, Cancer registration statistics, 2015(11) |       |        |
| ICD 10 C25                                    |       |        |                                                   |      |        | ICD 10 C25                                    |       |        |
| Age group                                     | Male  | Female | Age group                                         | Male | Female | Age group                                     | Male  | Female |
| 0-19                                          | 0.0   | 0.0    | N/A                                               | N/A  | N/A    | 0-34                                          | 0.0   | 0.0    |
| 20-24                                         | 0.0   | 0.2    | N/A                                               | N/A  | N/A    | 35-39                                         | 0.3   | 0.2    |
| 25-29                                         | 0.2   | 0.3    | N/A                                               | N/A  | N/A    | 40-44                                         | 1.6   | 1.3    |
| 30-34                                         | 0.5   | 0.7    | N/A                                               | N/A  | N/A    | 45-49                                         | 3.3   | 2.8    |
| 35-39                                         | 1.0   | 0.7    | N/A                                               | N/A  | N/A    | 50-54                                         | 8.4   | 6.1    |
| 40-44                                         | 2.8   | 1.9    | N/A                                               | N/A  | N/A    | 55-59                                         | 15.2  | 10.6   |
| 45-49                                         | 4.1   | 3.8    | N/A                                               | N/A  | N/A    | 60-64                                         | 25.4  | 21.3   |
| 50-54                                         | 10.5  | 7.9    | N/A                                               | N/A  | N/A    | 65-69                                         | 39.9  | 29.1   |
| 55-59                                         | 17.5  | 12.9   | N/A                                               | N/A  | N/A    | 70-74                                         | 57.2  | 43.8   |
| 60-64                                         | 29.7  | 23.1   | N/A                                               | N/A  | N/A    | 75-79                                         | 75.8  | 61.5   |
| 65-69                                         | 47.0  | 32.3   | N/A                                               | N/A  | N/A    | 80-84                                         | 99.9  | 82.0   |
| 70-74                                         | 62.7  | 48.3   | N/A                                               | N/A  | N/A    | 85-89                                         | 109.2 | 95.1   |
| 75-79                                         | 82.8  | 71.4   | N/A                                               | N/A  | N/A    | 90+                                           | 106.9 | 109.4  |
| 80-84                                         | 99.4  | 88.9   | N/A                                               | N/A  | N/A    |                                               |       |        |
| 85-89                                         | 111.1 | 101.8  | N/A                                               | N/A  | N/A    |                                               |       |        |
| 90+                                           | 101.2 | 99.5   | N/A                                               | N/A  | N/A    |                                               |       |        |

**Stroke**

**Table 15: Stroke epidemiological data (per 100,000 population)**

| Incidence                                              |        |        | Prevalence            |         |         | Mortality    |        |        |
|--------------------------------------------------------|--------|--------|-----------------------|---------|---------|--------------|--------|--------|
| Computed from Prevalence and Mortality                 |        |        | BHF CVD Stats 2014(6) |         |         | ONS 2015(2)  |        |        |
| Based on general practice records, ICD codes not given |        |        | ICD 10: I60-I69       |         |         | ICD: I60-I64 |        |        |
| Age group                                              | Male   | Female | Age group             | Male    | Female  | Age group    | Male   | Female |
| 0-44                                                   | 0.0    | 0.0    | 0-44                  | 100.0   | 110.0   | <1           | 0.0    | 0.0    |
| 45-54                                                  | 273.8  | 249.3  | 45-54                 | 850.0   | 750.0   | 1-4          | 0.0    | 0.0    |
| 55-64                                                  | 610.3  | 324.1  | 55-64                 | 2600.0  | 1800.0  | 5-14         | 0.0    | 0.0    |
| 65-74                                                  | 1314.6 | 1024.2 | 65-74                 | 6080.0  | 4160.0  | 15-24        | 0.2    | 0.0    |
| 75+                                                    | 2906.2 | 2566.2 | 75+                   | 14550.0 | 12170.0 | 25-34        | 0.1    | 0.1    |
|                                                        |        |        |                       |         |         | 35-44        | 0.7    | 0.5    |
|                                                        |        |        |                       |         |         | 45-54        | 3.3    | 2.3    |
|                                                        |        |        |                       |         |         | 55-64        | 18.6   | 9.1    |
|                                                        |        |        |                       |         |         | 65-74        | 67.1   | 45.8   |
|                                                        |        |        |                       |         |         | 75-84        | 359.7  | 288.3  |
|                                                        |        |        |                       |         |         | 85+          | 1335.1 | 1480.2 |

## Survival data

Survival statistics for CHD and Stroke were not identified in the literature. We modelled these using prevalence and mortality data, – see *Module two: Microsimulation model section Approximating missing disease statistics* for methods.

### CHD

**Table 16: Probability of 1, 5 and 10 year survival computed from prevalence and mortality data for Coronary Heart Disease.**

| Age | Survival probability – 1 year |       | Survival probability – 5 year |       | Survival probability – 10 year |       |
|-----|-------------------------------|-------|-------------------------------|-------|--------------------------------|-------|
|     | M                             | F     | M                             | F     | M                              | F     |
| 1-5 | 1.000                         | 1.000 | 1.000                         | 1.000 | 1.000                          | 1.000 |
| 6   | 0.500                         | 1.000 | 0.500                         | 1.000 | 0.500                          | 1.000 |
| 7   | 0.667                         | 1.000 | 0.667                         | 1.000 | 0.667                          | 1.000 |
| 8   | 0.750                         | 1.000 | 0.750                         | 1.000 | 0.750                          | 1.000 |
| 9   | 0.800                         | 1.000 | 0.800                         | 1.000 | 0.800                          | 1.000 |
| 10  | 0.833                         | 1.000 | 0.833                         | 1.000 | 0.833                          | 1.000 |
| 11  | 0.857                         | 1.000 | 0.857                         | 1.000 | 0.857                          | 1.000 |
| 12  | 0.875                         | 1.000 | 0.875                         | 1.000 | 0.875                          | 1.000 |
| 13  | 0.889                         | 1.000 | 0.889                         | 1.000 | 0.889                          | 1.000 |
| 14  | 0.900                         | 1.000 | 0.900                         | 1.000 | 0.900                          | 1.000 |
| 15  | 1.000                         | 0.000 | 1.000                         | 0.000 | 1.000                          | 0.000 |
| 16  | 1.000                         | 0.500 | 1.000                         | 0.500 | 1.000                          | 0.500 |
| 17  | 1.000                         | 0.667 | 1.000                         | 0.667 | 1.000                          | 0.667 |
| 18  | 1.000                         | 0.750 | 1.000                         | 0.750 | 1.000                          | 0.750 |
| 19  | 1.000                         | 0.800 | 1.000                         | 0.800 | 1.000                          | 0.800 |
| 20  | 1.000                         | 0.833 | 1.000                         | 0.833 | 1.000                          | 0.833 |
| 21  | 1.000                         | 0.857 | 1.000                         | 0.857 | 1.000                          | 0.857 |
| 22  | 1.000                         | 0.875 | 1.000                         | 0.875 | 1.000                          | 0.875 |
| 23  | 1.000                         | 0.889 | 1.000                         | 0.889 | 1.000                          | 0.889 |
| 24  | 1.000                         | 0.900 | 1.000                         | 0.900 | 1.000                          | 0.900 |
| 25  | 0.792                         | 0.849 | 0.792                         | 0.849 | 0.792                          | 0.849 |
| 26  | 0.828                         | 0.868 | 0.828                         | 0.868 | 0.828                          | 0.868 |
| 27  | 0.853                         | 0.884 | 0.853                         | 0.884 | 0.853                          | 0.884 |
| 28  | 0.872                         | 0.896 | 0.872                         | 0.896 | 0.872                          | 0.896 |

Technical Appendix

|    |       |       |       |       |       |       |
|----|-------|-------|-------|-------|-------|-------|
| 29 | 0.887 | 0.906 | 0.887 | 0.906 | 0.887 | 0.906 |
| 30 | 0.898 | 0.914 | 0.898 | 0.914 | 0.898 | 0.914 |
| 31 | 0.908 | 0.921 | 0.908 | 0.921 | 0.908 | 0.921 |
| 32 | 0.915 | 0.927 | 0.915 | 0.927 | 0.915 | 0.927 |
| 33 | 0.922 | 0.932 | 0.922 | 0.932 | 0.922 | 0.932 |
| 34 | 0.928 | 0.936 | 0.928 | 0.936 | 0.928 | 0.936 |
| 35 | 0.507 | 0.595 | 0.507 | 0.595 | 0.507 | 0.595 |
| 36 | 0.670 | 0.712 | 0.670 | 0.712 | 0.670 | 0.712 |
| 37 | 0.752 | 0.776 | 0.752 | 0.776 | 0.752 | 0.776 |
| 38 | 0.801 | 0.817 | 0.801 | 0.817 | 0.801 | 0.817 |
| 39 | 0.834 | 0.845 | 0.834 | 0.845 | 0.834 | 0.845 |
| 40 | 0.858 | 0.866 | 0.858 | 0.866 | 0.858 | 0.866 |
| 41 | 0.875 | 0.882 | 0.875 | 0.882 | 0.875 | 0.882 |
| 42 | 0.889 | 0.894 | 0.889 | 0.894 | 0.889 | 0.894 |
| 43 | 0.900 | 0.905 | 0.900 | 0.905 | 0.900 | 0.905 |
| 44 | 0.909 | 0.913 | 0.909 | 0.913 | 0.909 | 0.913 |
| 45 | 0.637 | 0.583 | 0.637 | 0.583 | 0.637 | 0.583 |
| 46 | 0.734 | 0.706 | 0.734 | 0.706 | 0.734 | 0.706 |
| 47 | 0.790 | 0.773 | 0.790 | 0.773 | 0.790 | 0.773 |
| 48 | 0.826 | 0.815 | 0.826 | 0.815 | 0.826 | 0.815 |
| 49 | 0.852 | 0.844 | 0.852 | 0.844 | 0.852 | 0.844 |
| 50 | 0.871 | 0.865 | 0.871 | 0.865 | 0.871 | 0.865 |
| 51 | 0.886 | 0.881 | 0.886 | 0.881 | 0.886 | 0.881 |
| 52 | 0.898 | 0.894 | 0.898 | 0.894 | 0.898 | 0.894 |
| 53 | 0.907 | 0.904 | 0.907 | 0.904 | 0.907 | 0.904 |
| 54 | 0.915 | 0.912 | 0.915 | 0.912 | 0.915 | 0.912 |
| 55 | 0.702 | 0.638 | 0.702 | 0.638 | 0.702 | 0.638 |
| 56 | 0.771 | 0.734 | 0.771 | 0.734 | 0.771 | 0.734 |
| 57 | 0.813 | 0.790 | 0.813 | 0.790 | 0.813 | 0.790 |
| 58 | 0.843 | 0.827 | 0.843 | 0.827 | 0.843 | 0.827 |
| 59 | 0.864 | 0.852 | 0.864 | 0.852 | 0.864 | 0.852 |
| 60 | 0.880 | 0.871 | 0.880 | 0.871 | 0.880 | 0.871 |
| 61 | 0.893 | 0.886 | 0.893 | 0.886 | 0.893 | 0.886 |
| 62 | 0.903 | 0.898 | 0.903 | 0.898 | 0.903 | 0.898 |
| 63 | 0.912 | 0.907 | 0.912 | 0.907 | 0.912 | 0.907 |
| 64 | 0.919 | 0.915 | 0.919 | 0.915 | 0.919 | 0.915 |

## Technical Appendix

|     |       |       |       |       |       |       |
|-----|-------|-------|-------|-------|-------|-------|
| 65  | 0.757 | 0.766 | 0.757 | 0.766 | 0.757 | 0.766 |
| 66  | 0.804 | 0.810 | 0.804 | 0.810 | 0.804 | 0.810 |
| 67  | 0.836 | 0.840 | 0.836 | 0.840 | 0.836 | 0.840 |
| 68  | 0.859 | 0.862 | 0.859 | 0.862 | 0.859 | 0.862 |
| 69  | 0.876 | 0.879 | 0.876 | 0.879 | 0.876 | 0.879 |
| 70  | 0.890 | 0.892 | 0.890 | 0.892 | 0.890 | 0.892 |
| 71  | 0.901 | 0.902 | 0.901 | 0.902 | 0.901 | 0.902 |
| 72  | 0.910 | 0.911 | 0.910 | 0.911 | 0.910 | 0.911 |
| 73  | 0.917 | 0.918 | 0.917 | 0.918 | 0.917 | 0.918 |
| 74  | 0.923 | 0.924 | 0.923 | 0.924 | 0.923 | 0.924 |
| 75  | 0.817 | 0.825 | 0.817 | 0.825 | 0.817 | 0.825 |
| 76  | 0.845 | 0.851 | 0.845 | 0.851 | 0.845 | 0.851 |
| 77  | 0.865 | 0.870 | 0.865 | 0.870 | 0.865 | 0.870 |
| 78  | 0.881 | 0.884 | 0.881 | 0.884 | 0.881 | 0.884 |
| 79  | 0.893 | 0.896 | 0.893 | 0.896 | 0.893 | 0.896 |
| 80  | 0.903 | 0.906 | 0.903 | 0.906 | 0.903 | 0.906 |
| 81  | 0.911 | 0.914 | 0.911 | 0.914 | 0.911 | 0.914 |
| 82  | 0.918 | 0.920 | 0.918 | 0.920 | 0.918 | 0.920 |
| 83  | 0.924 | 0.926 | 0.924 | 0.926 | 0.924 | 0.926 |
| 84  | 0.929 | 0.931 | 0.929 | 0.931 | 0.929 | 0.931 |
| 85  | 0.846 | 0.879 | 0.846 | 0.879 | 0.846 | 0.879 |
| 86  | 0.865 | 0.892 | 0.865 | 0.892 | 0.865 | 0.892 |
| 87  | 0.880 | 0.902 | 0.880 | 0.902 | 0.880 | 0.902 |
| 88  | 0.892 | 0.910 | 0.892 | 0.910 | 0.892 | 0.910 |
| 89  | 0.902 | 0.917 | 0.902 | 0.917 | 0.902 | 0.917 |
| 90  | 0.910 | 0.923 | 0.910 | 0.923 | 0.910 | 0.923 |
| 91  | 0.917 | 0.928 | 0.917 | 0.928 | 0.917 | 0.928 |
| 92  | 0.922 | 0.933 | 0.922 | 0.933 | 0.922 | 0.933 |
| 93  | 0.927 | 0.937 | 0.927 | 0.937 | 0.927 | 0.937 |
| 94  | 0.932 | 0.940 | 0.932 | 0.940 | 0.932 | 0.940 |
| 95  | 0.936 | 0.943 | 0.936 | 0.943 | 0.936 | 0.943 |
| 96  | 0.939 | 0.946 | 0.939 | 0.946 | 0.939 | 0.946 |
| 97  | 0.942 | 0.948 | 0.942 | 0.948 | 0.942 | 0.948 |
| 98  | 0.945 | 0.951 | 0.945 | 0.951 | 0.945 | 0.951 |
| 99  | 0.947 | 0.953 | 0.947 | 0.953 | 0.947 | 0.953 |
| 100 | 0.949 | 0.955 | 0.949 | 0.955 | 0.949 | 0.955 |

## Technical Appendix

|      |       |       |       |       |       |       |
|------|-------|-------|-------|-------|-------|-------|
| 101  | 0.951 | 0.956 | 0.951 | 0.956 | 0.951 | 0.956 |
| 102  | 0.953 | 0.958 | 0.953 | 0.958 | 0.953 | 0.958 |
| 103  | 0.955 | 0.960 | 0.955 | 0.960 | 0.955 | 0.960 |
| 104  | 0.956 | 0.961 | 0.956 | 0.961 | 0.956 | 0.961 |
| 105  | 0.958 | 0.962 | 0.958 | 0.962 | 0.958 | 0.962 |
| 106  | 0.959 | 0.963 | 0.959 | 0.963 | 0.959 | 0.963 |
| 107  | 0.960 | 0.964 | 0.960 | 0.964 | 0.960 | 0.964 |
| 108  | 0.962 | 0.965 | 0.962 | 0.965 | 0.962 | 0.965 |
| 109  | 0.963 | 0.966 | 0.963 | 0.966 | 0.963 | 0.966 |
| 109+ | 0.963 | 0.966 | 0.963 | 0.966 | 0.963 | 0.966 |

**Stroke**

**Table 17. Probability of 1, 5 and 10 year survival computed from prevalence and mortality data for Stroke.**

| Age | Stroke                        |       |                               |       |                                |       |
|-----|-------------------------------|-------|-------------------------------|-------|--------------------------------|-------|
|     | Survival probability – 1 year |       | Survival probability – 5 year |       | Survival probability – 10 year |       |
|     | M                             | F     | M                             | F     | M                              | F     |
| 1   | 1.000                         | 0.988 | 1.000                         | 0.988 | 1.000                          | 0.988 |
| 2   | 1.000                         | 0.994 | 1.000                         | 0.994 | 1.000                          | 0.994 |
| 3   | 1.000                         | 0.996 | 1.000                         | 0.996 | 1.000                          | 0.996 |
| 4   | 1.000                         | 0.997 | 1.000                         | 0.997 | 1.000                          | 0.997 |
| 5   | 0.998                         | 0.995 | 0.998                         | 0.995 | 0.998                          | 0.995 |
| 6   | 0.998                         | 0.996 | 0.998                         | 0.996 | 0.998                          | 0.996 |
| 7   | 0.998                         | 0.996 | 0.998                         | 0.996 | 0.998                          | 0.996 |
| 8   | 0.998                         | 0.997 | 0.998                         | 0.997 | 0.998                          | 0.997 |
| 9   | 0.999                         | 0.997 | 0.999                         | 0.997 | 0.999                          | 0.997 |
| 10  | 0.999                         | 0.997 | 0.999                         | 0.997 | 0.999                          | 0.997 |
| 11  | 0.999                         | 0.998 | 0.999                         | 0.998 | 0.999                          | 0.998 |
| 12  | 0.999                         | 0.998 | 0.999                         | 0.998 | 0.999                          | 0.998 |
| 13  | 0.999                         | 0.998 | 0.999                         | 0.998 | 0.999                          | 0.998 |
| 14  | 0.999                         | 0.998 | 0.999                         | 0.998 | 0.999                          | 0.998 |
| 15  | 0.995                         | 0.997 | 0.995                         | 0.997 | 0.995                          | 0.997 |
| 16  | 0.995                         | 0.997 | 0.995                         | 0.997 | 0.995                          | 0.997 |
| 17  | 0.996                         | 0.997 | 0.996                         | 0.997 | 0.996                          | 0.997 |
| 18  | 0.996                         | 0.997 | 0.996                         | 0.997 | 0.996                          | 0.997 |
| 19  | 0.996                         | 0.997 | 0.996                         | 0.997 | 0.996                          | 0.997 |
| 20  | 0.996                         | 0.997 | 0.996                         | 0.997 | 0.996                          | 0.997 |
| 21  | 0.997                         | 0.998 | 0.997                         | 0.998 | 0.997                          | 0.998 |
| 22  | 0.997                         | 0.998 | 0.997                         | 0.998 | 0.997                          | 0.998 |
| 23  | 0.997                         | 0.998 | 0.997                         | 0.998 | 0.997                          | 0.998 |
| 24  | 0.997                         | 0.998 | 0.997                         | 0.998 | 0.997                          | 0.998 |
| 25  | 0.948                         | 0.994 | 0.948                         | 0.994 | 0.948                          | 0.994 |
| 26  | 0.950                         | 0.994 | 0.950                         | 0.994 | 0.950                          | 0.994 |
| 27  | 0.952                         | 0.994 | 0.952                         | 0.994 | 0.952                          | 0.994 |
| 28  | 0.953                         | 0.994 | 0.953                         | 0.994 | 0.953                          | 0.994 |
| 29  | 0.955                         | 0.994 | 0.955                         | 0.994 | 0.955                          | 0.994 |

Technical Appendix

|    |       |       |       |       |       |       |
|----|-------|-------|-------|-------|-------|-------|
| 30 | 0.956 | 0.995 | 0.956 | 0.995 | 0.956 | 0.995 |
| 31 | 0.958 | 0.995 | 0.958 | 0.995 | 0.958 | 0.995 |
| 32 | 0.959 | 0.995 | 0.959 | 0.995 | 0.959 | 0.995 |
| 33 | 0.960 | 0.995 | 0.960 | 0.995 | 0.960 | 0.995 |
| 34 | 0.962 | 0.995 | 0.962 | 0.995 | 0.962 | 0.995 |
| 35 | 0.987 | 0.986 | 0.987 | 0.986 | 0.987 | 0.986 |
| 36 | 0.987 | 0.987 | 0.987 | 0.987 | 0.987 | 0.987 |
| 37 | 0.987 | 0.987 | 0.987 | 0.987 | 0.987 | 0.987 |
| 38 | 0.988 | 0.987 | 0.988 | 0.987 | 0.988 | 0.987 |
| 39 | 0.988 | 0.988 | 0.988 | 0.988 | 0.988 | 0.988 |
| 40 | 0.988 | 0.988 | 0.988 | 0.988 | 0.988 | 0.988 |
| 41 | 0.989 | 0.988 | 0.989 | 0.988 | 0.989 | 0.988 |
| 42 | 0.989 | 0.989 | 0.989 | 0.989 | 0.989 | 0.989 |
| 43 | 0.989 | 0.989 | 0.989 | 0.989 | 0.989 | 0.989 |
| 44 | 0.989 | 0.989 | 0.989 | 0.989 | 0.989 | 0.989 |
| 45 | 0.977 | 0.976 | 0.977 | 0.976 | 0.977 | 0.976 |
| 46 | 0.982 | 0.980 | 0.982 | 0.980 | 0.982 | 0.980 |
| 47 | 0.985 | 0.983 | 0.985 | 0.983 | 0.985 | 0.983 |
| 48 | 0.987 | 0.985 | 0.987 | 0.985 | 0.987 | 0.985 |
| 49 | 0.989 | 0.987 | 0.989 | 0.987 | 0.989 | 0.987 |
| 50 | 0.990 | 0.988 | 0.990 | 0.988 | 0.990 | 0.988 |
| 51 | 0.991 | 0.989 | 0.991 | 0.989 | 0.991 | 0.989 |
| 52 | 0.992 | 0.990 | 0.992 | 0.990 | 0.992 | 0.990 |
| 53 | 0.993 | 0.991 | 0.993 | 0.991 | 0.993 | 0.991 |
| 54 | 0.993 | 0.992 | 0.993 | 0.992 | 0.993 | 0.992 |
| 55 | 0.983 | 0.981 | 0.983 | 0.981 | 0.983 | 0.981 |
| 56 | 0.984 | 0.982 | 0.984 | 0.982 | 0.984 | 0.982 |
| 57 | 0.985 | 0.984 | 0.985 | 0.984 | 0.985 | 0.984 |
| 58 | 0.986 | 0.984 | 0.986 | 0.984 | 0.986 | 0.984 |
| 59 | 0.987 | 0.985 | 0.987 | 0.985 | 0.987 | 0.985 |
| 60 | 0.988 | 0.986 | 0.988 | 0.986 | 0.988 | 0.986 |
| 61 | 0.988 | 0.987 | 0.988 | 0.987 | 0.988 | 0.987 |
| 62 | 0.989 | 0.987 | 0.989 | 0.987 | 0.989 | 0.987 |
| 63 | 0.989 | 0.988 | 0.989 | 0.988 | 0.989 | 0.988 |
| 64 | 0.990 | 0.988 | 0.990 | 0.988 | 0.990 | 0.988 |
| 65 | 0.977 | 0.970 | 0.977 | 0.970 | 0.977 | 0.970 |



Technical Appendix

|     |       |       |       |       |       |       |
|-----|-------|-------|-------|-------|-------|-------|
| 66  | 0.980 | 0.974 | 0.980 | 0.974 | 0.980 | 0.974 |
| 67  | 0.982 | 0.977 | 0.982 | 0.977 | 0.982 | 0.977 |
| 68  | 0.983 | 0.979 | 0.983 | 0.979 | 0.983 | 0.979 |
| 69  | 0.985 | 0.981 | 0.985 | 0.981 | 0.985 | 0.981 |
| 70  | 0.986 | 0.983 | 0.986 | 0.983 | 0.986 | 0.983 |
| 71  | 0.987 | 0.984 | 0.987 | 0.984 | 0.987 | 0.984 |
| 72  | 0.988 | 0.985 | 0.988 | 0.985 | 0.988 | 0.985 |
| 73  | 0.989 | 0.986 | 0.989 | 0.986 | 0.989 | 0.986 |
| 74  | 0.989 | 0.987 | 0.989 | 0.987 | 0.989 | 0.987 |
| 75  | 0.960 | 0.949 | 0.960 | 0.949 | 0.960 | 0.949 |
| 76  | 0.964 | 0.956 | 0.964 | 0.956 | 0.964 | 0.956 |
| 77  | 0.967 | 0.962 | 0.967 | 0.962 | 0.967 | 0.962 |
| 78  | 0.969 | 0.966 | 0.969 | 0.966 | 0.969 | 0.966 |
| 79  | 0.972 | 0.969 | 0.972 | 0.969 | 0.972 | 0.969 |
| 80  | 0.973 | 0.972 | 0.973 | 0.972 | 0.973 | 0.972 |
| 81  | 0.975 | 0.974 | 0.975 | 0.974 | 0.975 | 0.974 |
| 82  | 0.977 | 0.976 | 0.977 | 0.976 | 0.977 | 0.976 |
| 83  | 0.978 | 0.978 | 0.978 | 0.978 | 0.978 | 0.978 |
| 84  | 0.979 | 0.979 | 0.979 | 0.979 | 0.979 | 0.979 |
| 85  | 0.935 | 0.922 | 0.935 | 0.922 | 0.935 | 0.922 |
| 86  | 0.938 | 0.926 | 0.938 | 0.926 | 0.938 | 0.926 |
| 87  | 0.941 | 0.930 | 0.941 | 0.930 | 0.941 | 0.930 |
| 88  | 0.944 | 0.933 | 0.944 | 0.933 | 0.944 | 0.933 |
| 89  | 0.946 | 0.936 | 0.946 | 0.936 | 0.946 | 0.936 |
| 90  | 0.948 | 0.939 | 0.948 | 0.939 | 0.948 | 0.939 |
| 91  | 0.950 | 0.942 | 0.950 | 0.942 | 0.950 | 0.942 |
| 92  | 0.951 | 0.944 | 0.951 | 0.944 | 0.951 | 0.944 |
| 93  | 0.953 | 0.946 | 0.953 | 0.946 | 0.953 | 0.946 |
| 94  | 0.955 | 0.948 | 0.955 | 0.948 | 0.955 | 0.948 |
| 95  | 0.956 | 0.950 | 0.956 | 0.950 | 0.956 | 0.950 |
| 96  | 0.957 | 0.951 | 0.957 | 0.951 | 0.957 | 0.951 |
| 97  | 0.958 | 0.953 | 0.958 | 0.953 | 0.958 | 0.953 |
| 98  | 0.960 | 0.954 | 0.960 | 0.954 | 0.960 | 0.954 |
| 99  | 0.961 | 0.956 | 0.961 | 0.956 | 0.961 | 0.956 |
| 100 | 0.962 | 0.957 | 0.962 | 0.957 | 0.962 | 0.957 |
| 101 | 0.963 | 0.958 | 0.963 | 0.958 | 0.963 | 0.958 |

|      |       |       |       |       |       |       |
|------|-------|-------|-------|-------|-------|-------|
| 102  | 0.964 | 0.959 | 0.964 | 0.959 | 0.964 | 0.959 |
| 103  | 0.964 | 0.960 | 0.964 | 0.960 | 0.964 | 0.960 |
| 104  | 0.965 | 0.961 | 0.965 | 0.961 | 0.965 | 0.961 |
| 105  | 0.966 | 0.962 | 0.966 | 0.962 | 0.966 | 0.962 |
| 106  | 0.967 | 0.963 | 0.967 | 0.963 | 0.967 | 0.963 |
| 107  | 0.967 | 0.964 | 0.967 | 0.964 | 0.967 | 0.964 |
| 108  | 0.968 | 0.965 | 0.968 | 0.965 | 0.968 | 0.965 |
| 109  | 0.969 | 0.965 | 0.969 | 0.965 | 0.969 | 0.965 |
| 109+ | 0.969 | 0.965 | 0.969 | 0.965 | 0.969 | 0.965 |

### Breast Cancer

**Table 18. Probability of 1, 5 year survival data for Breast cancer(16)**

| Age   | Survival probability<br>– 1 year |       | Survival probability<br>– 5 year |       |
|-------|----------------------------------|-------|----------------------------------|-------|
|       | M                                | F     | M                                | F     |
| 50-59 | N/A                              | 0.987 | N/A                              | 0.923 |
| 60-69 | N/A                              | 0.984 | N/A                              | 0.927 |
| 70-79 | N/A                              | 0.973 | N/A                              | 0.909 |
| 80-99 | N/A                              | 0.898 | N/A                              | 0.741 |

### Colorectal Cancer

**Table 19. Probability of 1, 5 year survival data for Colorectal cancer(16)**

| Age   | Survival probability<br>– 1 year |       | Survival probability<br>– 5 year |       |
|-------|----------------------------------|-------|----------------------------------|-------|
|       | M                                | F     | M                                | F     |
| 15-44 | 0.876                            | 0.887 | 0.707                            | 0.713 |
| 45-54 | 0.86                             | 0.867 | 0.634                            | 0.665 |
| 55-64 | 0.858                            | 0.860 | 0.672                            | 0.679 |
| 65-74 | 0.827                            | 0.813 | 0.661                            | 0.651 |
| 75+   | 0.679                            | 0.623 | 0.49                             | 0.464 |

### Endometrial Cancer

**Table 20. Probability of 1, 5 year survival for Endometrial cancer(16)**

| Age   | Survival probability<br>– 1 year |       | Survival probability<br>– 5 year |       |
|-------|----------------------------------|-------|----------------------------------|-------|
|       | M                                | F     | M                                | F     |
| 15-44 |                                  | 0.946 |                                  | 0.876 |
| 45-54 | NA                               | 0.945 | NA                               | 0.869 |
| 55-64 | NA                               | 0.948 | NA                               | 0.855 |
| 65-74 | NA                               | 0.915 | NA                               | 0.785 |
| 75+   | NA                               | 0.807 | NA                               | 0.631 |

### Kidney Cancer

**Table 21. Probability of 1, 5 year survival data for Kidney cancer(16)**

| Age   | Survival probability<br>– 1 year |       | Survival probability<br>– 5 year |       |
|-------|----------------------------------|-------|----------------------------------|-------|
|       | M                                | F     | M                                | F     |
| 15-49 | 0.898                            | 0.913 | 0.804                            | 0.84  |
| 50-59 | 0.855                            | 0.873 | 0.721                            | 0.781 |
| 60-69 | 0.817                            | 0.842 | 0.661                            | 0.717 |
| 70-79 | 0.785                            | 0.797 | 0.611                            | 0.654 |
| 80-99 | 0.651                            | 0.619 | 0.476                            | 0.442 |

### Oesophagus Cancer

**Table 22. Probability of 1, 5 year survival data for Oesophageal cancer(16)**

| Age   | Survival probability<br>– 1 year |       | Survival probability<br>– 5 year |       |
|-------|----------------------------------|-------|----------------------------------|-------|
|       | M                                | F     | M                                | F     |
| 15-49 | 0.559                            | 0.531 | 0.227                            | NA    |
| 50-59 | 0.537                            | 0.589 | 0.227                            | 0.248 |
| 60-69 | 0.524                            | 0.543 | 0.204                            | 0.257 |
| 70-79 | 0.501                            | 0.519 | 0.197                            | 0.211 |
| 80-99 | 0.345                            | 0.293 | 0.094                            | 0.083 |

## Ovarian Cancer

**Table 23. Probability of 1, 5 year survival data for Ovarian cancer(16)**

| Age   | Survival probability<br>– 1 year |       | Survival probability<br>– 5 year |       |
|-------|----------------------------------|-------|----------------------------------|-------|
|       | M                                | F     | M                                | F     |
| 15-49 | NA                               | 0.946 | NA                               | 0.847 |
| 50-59 | NA                               | 0.920 | NA                               | 0.692 |
| 60-69 | NA                               | 0.847 | NA                               | 0.556 |
| 70-79 | NA                               | 0.757 | NA                               | 0.423 |
| 80-99 | NA                               | 0.484 | NA                               | 0.246 |

## Pancreas Cancer

**Table 24. Probability of 1, 5 year data for Oesophagus cancer(16)**

| Age   | Survival probability<br>– 1 year |       | Survival probability<br>– 5 year |       |
|-------|----------------------------------|-------|----------------------------------|-------|
|       | M                                | F     | M                                | F     |
| 15-49 | 0.477                            | 0.655 | 0.917                            | NA    |
| 50-59 | 0.356                            | 0.400 | 0.125                            | 0.178 |
| 60-69 | 0.292                            | 0.320 | 0.076                            | 0.093 |
| 70-79 | 0.231                            | 0.259 | 0.056                            | 0.060 |
| 80-99 | 0.131                            | 0.124 | 0.033                            | 0.034 |

## Relative Risks

This document provides the sources and estimates of the Relative Risk (RR) of defined diseases according to BMI status (given as per BMI unit increase from BMI 22 = 1.0; and per BMI category of Overweight and Obese relative to normal weight). The RR used for the Dynamo-HIA study is given in the last line of each table. Adjustments for age and smoking are given as multipliers of the differential risk, i.e. as a multiplier of the difference in relative risk from the base (1.0). Thus an adjustment multiplier of x0.95 applied to an RR of 1.20 would lead to an RR of 1.19 (calculated as  $RR' = 1 + A(RR-1)$  where RR is the given relative risk, RR' is the adjusted relative risk and A is the adjustment multiplier).

**Table 25: Relative risk for Breast cancer**

| BMI groups<br>(kg/m <sup>2</sup> ) | Breast cancer |       |        |        |
|------------------------------------|---------------|-------|--------|--------|
|                                    | Age groups    |       |        |        |
|                                    | 0-49          | 0-49  | 50-110 | 50-110 |
|                                    | M             | F     | M      | F      |
| <25                                | 1.000         | 1.000 | 1.000  | 1.000  |
| 25-30                              | 1.000         | 1.000 | 1.000  | 1.120  |
| >30                                | 1.000         | 1.000 | 1.000  | 1.250  |

**Table 26: Relative risk for Coronary heart disease**

| BMI<br>groups<br>(kg/m <sup>2</sup> ) | Coronary heart disease |       |        |        |
|---------------------------------------|------------------------|-------|--------|--------|
|                                       | Age groups             |       |        |        |
|                                       | 20-64                  | 20-64 | 65-110 | 65-110 |
|                                       | M                      | F     | M      | F      |
| 22                                    | 1.000                  | 1.000 | 1.000  | 1.000  |
| 23                                    | 1.070                  | 1.100 | 1.049  | 1.070  |
| 24                                    | 1.145                  | 1.210 | 1.101  | 1.147  |
| 25                                    | 1.225                  | 1.331 | 1.158  | 1.232  |
| 26                                    | 1.311                  | 1.464 | 1.218  | 1.325  |
| 27                                    | 1.403                  | 1.611 | 1.282  | 1.427  |
| 28                                    | 1.501                  | 1.772 | 1.351  | 1.540  |
| 29                                    | 1.606                  | 1.949 | 1.424  | 1.664  |
| 30                                    | 1.718                  | 2.144 | 1.503  | 1.801  |
| 31                                    | 1.838                  | 2.358 | 1.587  | 1.951  |
| 32                                    | 1.967                  | 2.594 | 1.677  | 2.116  |
| 33                                    | 2.105                  | 2.853 | 1.773  | 2.297  |
| 34                                    | 2.252                  | 3.138 | 1.877  | 2.497  |
| 35                                    | 2.410                  | 3.452 | 1.987  | 2.717  |
| 36                                    | 2.579                  | 3.797 | 2.105  | 2.958  |
| 37                                    | 2.759                  | 4.177 | 2.231  | 3.224  |
| 38                                    | 2.952                  | 4.595 | 2.367  | 3.516  |
| 39                                    | 3.159                  | 5.054 | 2.511  | 3.838  |
| 40                                    | 3.380                  | 5.560 | 2.666  | 4.192  |
| 41                                    | 3.617                  | 6.116 | 2.832  | 4.581  |
| 42                                    | 3.870                  | 6.727 | 3.009  | 5.009  |
| 43                                    | 4.141                  | 7.400 | 3.198  | 5.480  |

|     |       |       |       |       |
|-----|-------|-------|-------|-------|
| 44  | 4.430 | 8.140 | 3.401 | 5.998 |
| 45+ | 4.741 | 8.954 | 3.618 | 6.568 |

**Table 27: Relative risks for Colorectal cancer**

| BMI groups (kg/m <sup>2</sup> ) | Colorectal cancer |       |        |        |
|---------------------------------|-------------------|-------|--------|--------|
|                                 | Age groups        |       |        |        |
|                                 | 20-44             | 20-44 | 45-110 | 45-110 |
|                                 | M                 | F     | M      | F      |
| 22                              | 1.000             | 1.000 | 1.000  | 1.000  |
| 23                              | 1.040             | 1.020 | 1.036  | 1.018  |
| 24                              | 1.082             | 1.040 | 1.073  | 1.036  |
| 25                              | 1.125             | 1.061 | 1.112  | 1.055  |
| 26                              | 1.170             | 1.082 | 1.153  | 1.074  |
| 27                              | 1.217             | 1.104 | 1.195  | 1.094  |
| 28                              | 1.265             | 1.126 | 1.239  | 1.114  |
| 29                              | 1.316             | 1.149 | 1.284  | 1.134  |
| 30                              | 1.369             | 1.172 | 1.332  | 1.154  |
| 31                              | 1.423             | 1.195 | 1.381  | 1.176  |
| 32                              | 1.480             | 1.219 | 1.432  | 1.197  |
| 33                              | 1.539             | 1.243 | 1.486  | 1.219  |
| 34                              | 1.601             | 1.268 | 1.541  | 1.241  |
| 35                              | 1.665             | 1.294 | 1.599  | 1.264  |
| 36                              | 1.732             | 1.319 | 1.659  | 1.288  |
| 37                              | 1.801             | 1.346 | 1.721  | 1.311  |
| 38                              | 1.873             | 1.373 | 1.786  | 1.336  |
| 39                              | 1.948             | 1.400 | 1.853  | 1.360  |
| 40                              | 2.026             | 1.428 | 1.923  | 1.385  |
| 41                              | 2.107             | 1.457 | 1.996  | 1.411  |
| 42                              | 2.191             | 1.486 | 2.072  | 1.437  |
| 43                              | 2.279             | 1.516 | 2.151  | 1.464  |
| 44                              | 2.370             | 1.546 | 2.233  | 1.491  |
| 45+                             | 2.465             | 1.577 | 2.318  | 1.519  |

**Table 28: Relative risk for Diabetes (Type 2)**

|  |                                        |
|--|----------------------------------------|
|  | Diabetes (from no disease to diabetes) |
|  | Age groups                             |

| BMI groups (kg/m <sup>2</sup> ) | 20-64  | 20-64  | 65-74  | 65-74  | 75-110 | 75-110 |
|---------------------------------|--------|--------|--------|--------|--------|--------|
|                                 | M      | F      | M      | F      | M      | F      |
| 22                              | 1.000  | 1.000  | 1.000  | 1.000  | 1.000  | 1.000  |
| 23                              | 1.180  | 1.220  | 1.166  | 1.202  | 1.149  | 1.182  |
| 24                              | 1.392  | 1.488  | 1.361  | 1.449  | 1.325  | 1.404  |
| 25                              | 1.643  | 1.816  | 1.592  | 1.751  | 1.532  | 1.676  |
| 26                              | 1.939  | 2.215  | 1.864  | 2.118  | 1.777  | 2.006  |
| 27                              | 2.288  | 2.703  | 2.185  | 2.566  | 2.066  | 2.410  |
| 28                              | 2.700  | 3.297  | 2.564  | 3.114  | 2.407  | 2.902  |
| 29                              | 3.185  | 4.023  | 3.011  | 3.781  | 2.810  | 3.503  |
| 30                              | 3.759  | 4.908  | 3.538  | 4.595  | 3.284  | 4.236  |
| 31                              | 4.435  | 5.987  | 4.161  | 5.588  | 3.845  | 5.130  |
| 32                              | 5.234  | 7.305  | 4.895  | 6.800  | 4.506  | 6.220  |
| 33                              | 6.176  | 8.912  | 5.762  | 8.279  | 5.286  | 7.551  |
| 34                              | 7.288  | 10.872 | 6.785  | 10.082 | 6.206  | 9.174  |
| 35                              | 8.599  | 13.264 | 7.991  | 12.283 | 7.292  | 11.155 |
| 36                              | 10.147 | 16.182 | 9.415  | 14.968 | 8.574  | 13.571 |
| 37                              | 11.974 | 19.742 | 11.096 | 18.243 | 10.086 | 16.519 |
| 38                              | 14.129 | 24.086 | 13.079 | 22.239 | 11.871 | 20.115 |
| 39                              | 16.672 | 29.384 | 15.418 | 27.114 | 13.977 | 24.502 |
| 40                              | 19.673 | 35.849 | 18.179 | 33.061 | 16.461 | 29.855 |
| 41                              | 23.214 | 43.736 | 21.437 | 40.317 | 19.394 | 36.385 |
| 42                              | 27.393 | 53.358 | 25.282 | 49.169 | 22.853 | 44.352 |
| 43                              | 32.324 | 65.096 | 29.818 | 59.969 | 26.936 | 54.072 |
| 44                              | 38.142 | 79.418 | 35.171 | 73.144 | 31.754 | 65.930 |
| 45+                             | 45.008 | 96.889 | 41.487 | 89.218 | 37.438 | 80.396 |

**Table 29: Relative risks for Endometrial cancer**

| BMI groups (kg/m <sup>2</sup> ) | Endometrial cancer |       |        |        |
|---------------------------------|--------------------|-------|--------|--------|
|                                 | Age groups         |       |        |        |
|                                 | 0-19               | 0-19  | 20-110 | 20-110 |
|                                 | M                  | F     | M      | F      |
| 22                              | 1.000              | 1.000 | 1.000  | 1.000  |
| 23                              | 1.000              | 1.000 | 1.000  | 1.100  |
| 24                              | 1.000              | 1.000 | 1.000  | 1.210  |

|     |       |       |       |       |
|-----|-------|-------|-------|-------|
| 25  | 1.000 | 1.000 | 1.000 | 1.331 |
| 26  | 1.000 | 1.000 | 1.000 | 1.464 |
| 27  | 1.000 | 1.000 | 1.000 | 1.611 |
| 28  | 1.000 | 1.000 | 1.000 | 1.772 |
| 29  | 1.000 | 1.000 | 1.000 | 1.949 |
| 30  | 1.000 | 1.000 | 1.000 | 2.144 |
| 31  | 1.000 | 1.000 | 1.000 | 2.358 |
| 32  | 1.000 | 1.000 | 1.000 | 2.594 |
| 33  | 1.000 | 1.000 | 1.000 | 2.853 |
| 34  | 1.000 | 1.000 | 1.000 | 3.138 |
| 35  | 1.000 | 1.000 | 1.000 | 3.452 |
| 36  | 1.000 | 1.000 | 1.000 | 3.797 |
| 37  | 1.000 | 1.000 | 1.000 | 4.177 |
| 38  | 1.000 | 1.000 | 1.000 | 4.595 |
| 39  | 1.000 | 1.000 | 1.000 | 5.054 |
| 40  | 1.000 | 1.000 | 1.000 | 5.560 |
| 41  | 1.000 | 1.000 | 1.000 | 6.116 |
| 42  | 1.000 | 1.000 | 1.000 | 6.727 |
| 43  | 1.000 | 1.000 | 1.000 | 7.400 |
| 44  | 1.000 | 1.000 | 1.000 | 8.140 |
| 45+ | 1.000 | 1.000 | 1.000 | 8.954 |

**Table 30: Relative risks for Hypertension**

| BMI groups<br>(kg/m <sup>2</sup> ) | Hypertension |       |        |        |
|------------------------------------|--------------|-------|--------|--------|
|                                    | Age groups   |       |        |        |
|                                    | 0-20         | 0-20  | 20-110 | 20-110 |
|                                    | M            | F     | M      | F      |
| 15-24.9                            | 1.000        | 1.000 | 1.000  | 1.000  |
| 25-29                              | 1.000        | 1.000 | 1.880  | 1.880  |
| 30-39.9                            | 1.000        | 1.000 | 3.720  | 3.720  |
| >40                                | 1.880        | 1.000 | 7.030  | 7.030  |

**Table 31: Relative risks for Knee Osteoarthritis**

| BMI groups<br>(kg/m <sup>2</sup> ) | Knee Osteoarthritis |       |        |        |
|------------------------------------|---------------------|-------|--------|--------|
|                                    | Age groups          |       |        |        |
|                                    | 16-75               | 16-75 | 76-110 | 76-110 |
|                                    |                     |       |        |        |



|       | M     | F     | M     | F     |
|-------|-------|-------|-------|-------|
| <25   | 1.000 | 1.000 | 1.000 | 1.000 |
| 25-30 | 2.450 | 2.450 | 1.000 | 1.000 |
| >30   | 4.550 | 4.550 | 1.000 | 1.000 |

**Table 32: Relative risks for Oesophageal cancer**

| BMI<br>groups<br>(kg/m <sup>2</sup> ) | Oesophageal cancer |       |        |        |
|---------------------------------------|--------------------|-------|--------|--------|
|                                       | Age Groups         |       |        |        |
|                                       | 0-24               | 0-24  | 25-100 | 25-100 |
|                                       | M                  | F     | M      | F      |
| 22                                    | 1.000              | 1.000 | 1.000  | 1.000  |
| 23                                    | 1.000              | 1.000 | 1.100  | 1.080  |
| 24                                    | 1.000              | 1.000 | 1.210  | 1.166  |
| 25                                    | 1.000              | 1.000 | 1.331  | 1.260  |
| 26                                    | 1.000              | 1.000 | 1.464  | 1.360  |
| 27                                    | 1.000              | 1.000 | 1.611  | 1.469  |
| 28                                    | 1.000              | 1.000 | 1.772  | 1.587  |
| 29                                    | 1.000              | 1.000 | 1.949  | 1.714  |
| 30                                    | 1.000              | 1.000 | 2.144  | 1.851  |
| 31                                    | 1.000              | 1.000 | 2.358  | 1.999  |
| 32                                    | 1.000              | 1.000 | 2.594  | 2.159  |
| 33                                    | 1.000              | 1.000 | 2.853  | 2.332  |
| 34                                    | 1.000              | 1.000 | 3.138  | 2.518  |
| 35                                    | 1.000              | 1.000 | 3.452  | 2.720  |
| 36                                    | 1.000              | 1.000 | 3.797  | 2.937  |
| 37                                    | 1.000              | 1.000 | 4.177  | 3.172  |
| 38                                    | 1.000              | 1.000 | 4.595  | 3.426  |
| 39                                    | 1.000              | 1.000 | 5.054  | 3.700  |
| 40                                    | 1.000              | 1.000 | 5.560  | 3.996  |
| 41                                    | 1.000              | 1.000 | 6.116  | 4.316  |
| 42                                    | 1.000              | 1.000 | 6.727  | 4.661  |
| 43                                    | 1.000              | 1.000 | 7.400  | 5.034  |
| 44                                    | 1.000              | 1.000 | 8.140  | 5.437  |
| 45+                                   | 1.000              | 1.000 | 8.954  | 5.871  |

**Table 33: Relative risks for Ovarian cancer**

| BMI groups (kg/m <sup>2</sup> ) | Ovarian cancer |       |        |        |
|---------------------------------|----------------|-------|--------|--------|
|                                 | Age groups     |       |        |        |
|                                 | 0-17           | 0-17  | 18-100 | 18-100 |
|                                 | M              | F     | M      | F      |
| <22.5                           | 1.000          | 1.000 | 1.000  | 1.000  |
| 22.5-25                         | 1.000          | 1.000 | 1.000  | 1.010  |
| 25-27.5                         | 1.000          | 1.000 | 1.000  | 1.050  |
| 27.5-30                         | 1.000          | 1.000 | 1.000  | 1.100  |
| 30-32.5                         | 1.000          | 1.000 | 1.000  | 1.170  |
| <32.5                           | 1.000          | 1.000 | 1.000  | 1.280  |

**Table 34: Relative risks for Pancreatic cancer**

| BMI groups (kg/m <sup>2</sup> ) | Pancreatic cancer |       |        |        |
|---------------------------------|-------------------|-------|--------|--------|
|                                 | Age groups        |       |        |        |
|                                 | 0-17              | 0-17  | 18-100 | 18-100 |
|                                 | M                 | F     | M      | F      |
| <25                             | 1.000             | 1.000 | 1.000  | 1.000  |
| 25-30                           | 1.000             | 1.000 | 1.140  | 1.140  |
| >30                             | 1.000             | 1.000 | 1.300  | 1.300  |

**Table 35: Relative risks for Renal cancer**

| BMI groups (kg/m <sup>2</sup> ) | Renal cancer |       |        |        |
|---------------------------------|--------------|-------|--------|--------|
|                                 | Age groups   |       |        |        |
|                                 | 0-19         | 0-19  | 20-110 | 20-110 |
|                                 | M            | F     | M      | F      |
| 22                              | 1.000        | 1.000 | 1.000  | 1.000  |
| 23                              | 1.000        | 1.000 | 1.050  | 1.050  |
| 24                              | 1.000        | 1.000 | 1.103  | 1.103  |
| 25                              | 1.000        | 1.000 | 1.158  | 1.158  |
| 26                              | 1.000        | 1.000 | 1.216  | 1.216  |
| 27                              | 1.000        | 1.000 | 1.276  | 1.276  |
| 28                              | 1.000        | 1.000 | 1.340  | 1.340  |
| 29                              | 1.000        | 1.000 | 1.407  | 1.407  |
| 30                              | 1.000        | 1.000 | 1.477  | 1.477  |
| 31                              | 1.000        | 1.000 | 1.551  | 1.551  |
| 32                              | 1.000        | 1.000 | 1.629  | 1.629  |

|     |       |       |       |       |
|-----|-------|-------|-------|-------|
| 33  | 1.000 | 1.000 | 1.710 | 1.710 |
| 34  | 1.000 | 1.000 | 1.796 | 1.796 |
| 35  | 1.000 | 1.000 | 1.886 | 1.886 |
| 36  | 1.000 | 1.000 | 1.980 | 1.980 |
| 37  | 1.000 | 1.000 | 2.079 | 2.079 |
| 38  | 1.000 | 1.000 | 2.183 | 2.183 |
| 39  | 1.000 | 1.000 | 2.292 | 2.292 |
| 40  | 1.000 | 1.000 | 2.407 | 2.407 |
| 41  | 1.000 | 1.000 | 2.527 | 2.527 |
| 42  | 1.000 | 1.000 | 2.653 | 2.653 |
| 43  | 1.000 | 1.000 | 2.786 | 2.786 |
| 44  | 1.000 | 1.000 | 2.925 | 2.925 |
| 45+ | 1.000 | 1.000 | 3.072 | 3.072 |

**Table 36: Relative risks for Stroke**

| BMI<br>groups<br>(kg/m <sup>2</sup> ) | Stroke     |       |        |       |
|---------------------------------------|------------|-------|--------|-------|
|                                       | Age groups |       |        |       |
|                                       | 20-64      |       | 65-110 |       |
|                                       | M          | F     | M      | F     |
| 22                                    | 1.000      | 1.000 | 1.000  | 1.000 |
| 23                                    | 1.040      | 1.040 | 1.030  | 1.030 |
| 24                                    | 1.082      | 1.082 | 1.061  | 1.061 |
| 25                                    | 1.125      | 1.125 | 1.094  | 1.094 |
| 26                                    | 1.170      | 1.170 | 1.127  | 1.127 |
| 27                                    | 1.217      | 1.217 | 1.162  | 1.162 |
| 28                                    | 1.265      | 1.265 | 1.199  | 1.199 |
| 29                                    | 1.316      | 1.316 | 1.237  | 1.237 |
| 30                                    | 1.369      | 1.369 | 1.276  | 1.276 |
| 31                                    | 1.423      | 1.423 | 1.317  | 1.317 |
| 32                                    | 1.480      | 1.480 | 1.360  | 1.360 |
| 33                                    | 1.539      | 1.539 | 1.405  | 1.405 |
| 34                                    | 1.601      | 1.601 | 1.451  | 1.451 |
| 35                                    | 1.665      | 1.665 | 1.499  | 1.499 |
| 36                                    | 1.732      | 1.732 | 1.549  | 1.549 |
| 37                                    | 1.801      | 1.801 | 1.601  | 1.601 |
| 38                                    | 1.873      | 1.873 | 1.655  | 1.655 |

|     |       |       |       |       |
|-----|-------|-------|-------|-------|
| 39  | 1.948 | 1.948 | 1.711 | 1.711 |
| 40  | 2.026 | 2.026 | 1.769 | 1.769 |
| 41  | 2.107 | 2.107 | 1.830 | 1.830 |
| 42  | 2.191 | 2.191 | 1.893 | 1.893 |
| 43  | 2.279 | 2.279 | 1.959 | 1.959 |
| 44  | 2.370 | 2.370 | 2.027 | 2.027 |
| 45+ | 2.465 | 2.465 | 2.099 | 2.099 |

## Health economic data

### Sources of cost data

UKHF conducted a review of current literature to identify the direct costs associated with treatments and services for specific health conditions that are covered by public funds. NHS 2012/2013 programme budget costs were used when no data was public data available. The main types of costs that were included are defined briefly below, however please note that the not all studies had all of these costs included in their research:

- Primary care is often the primary point of contact of someone seeking care. GP visits are the main source, but studies, when available, include other types of services offered by most of the GP practices. These include nurse visits, home visits, phone/email/fax consultations.
- Prescription costs are usually estimated as the volume times the costs of primary care prescription.
- Inpatient costs are the total costs of treating a patient at hospital for a specific diagnosis (episode). They include day cases, elective and emergency admissions.
- Outpatient costs capture the costs of visits to specialists.

We have not included in our different costs indirect costs such as the loss of income when hospitalised.

### Summary of identified costs

Table 1 summarises the costs used in the microsimulation. The majority of costs were extracted from the literature, however costs for two diseases came from the 2012-13 NHS programme budget costs.<sup>1</sup> More information about the costs used in each paper can be found in Health Economic Review excel workbook.

---

<sup>1</sup>We have been advised that Programme Budgeting data does not fully capture the actual health care expenditures, in particular for social care costs. Thus costs from the literature were preferred where data exists.

All the costs were adjusted using prevalence when necessary to represent the total cost per type of care and per disease group for England.

For the microsimulation model, we need the cost per case, which is the total cost divided by the prevalence in 2016. Therefore this figure is not necessarily equal to the unit cost as patients use different combinations and quantities of care.

Relevant sources were collated using a systematic literature review in PubMed, and completed using Google searches. We searched for peer-reviewed articles using PubMed. We also used Google to identify reports from other sources. We focused exclusively on costs based on English or UK data. While multiple studies from the search results were considered, the most relevant, recent studies were used for the final cost estimates. We rarely had the choice between two references, but in this case our selection criteria were the transparency of the method to estimate the costs with a preference for bottom-up approaches,<sup>2</sup> the clarity of the methodology and definitions, the source of data with a preference for national representative samples, and the years for which the costs were reported. All costs were adjusted for inflation using the CCEMG-EPPI-Centre cost Converter and divided by the prevalence in order to have a “cost per case”.(1)

---

<sup>2</sup> A bottom-up approach, in contrast to a top-down approach, reflects the actual needs. It quantifies each resource required to provide the services or treatments to care for patients with a specific condition, multiplied by the input costs. A top-down approach allocates a total figure (e.g. the NHS programme budgeting cost) to different services as such is less likely to capture the actual spending associated with a specific disease.

Technical Appendix

| Disease                  | Cost per case (£)<br>(inflated to 2016<br>values) | Outpatient<br>(post<br>diagnosis) | Hospital | Prescription | Year      | Method    | Reference                                                           | Location |
|--------------------------|---------------------------------------------------|-----------------------------------|----------|--------------|-----------|-----------|---------------------------------------------------------------------|----------|
| Colorectal<br>cancer     | £13563.22                                         | ☐                                 | ☐        | ☐            | 2011-2012 | Bottom-up | Hall et al 2015                                                     | UK       |
| Oesophageal<br>cancer    | £9568.28                                          | ☐                                 | ☐        | ☐            | 2006-2007 | Bottom-up | Agus et al. 2013                                                    | NI       |
| Renal (kidney)<br>cancer | £414.81                                           | ☐                                 | ☐        | ☐            | 2012-2013 |           | NHS programme budget                                                | England  |
| Ovarian<br>cancer        | £1408.94                                          |                                   |          |              | 2012-2013 |           | NHS programme budget                                                | England  |
| Pancreatic<br>cancer     | £5735.93                                          | ☐                                 | ☐        | ☐            | 2008      | Bottom-up | Mauro Laudicello and Imperial<br>College with Pancreatic Cancer UK. | UK       |
| CHD                      | £2838.70                                          | ☐                                 | ☐        | ☐            | 1999      | Top down  | Various                                                             | England  |
| Stroke                   | £1627.26                                          | ☐                                 | ☐        | ☐            | 2005      | Bottom-up | Saka et al. 2009                                                    | England  |
| Type 2<br>Diabetes       | £672.28                                           | ☐                                 | ☐        | ☐            | 2010-2011 | Top down  | Various                                                             | England  |

|                                    |           |                          |                          |                          |           |           |                       |         |
|------------------------------------|-----------|--------------------------|--------------------------|--------------------------|-----------|-----------|-----------------------|---------|
| Technical Appendix<br>Hypertension | £493.15   | <input type="checkbox"/> | ✓ - tests<br>not stay    | <input type="checkbox"/> | 2007-2008 | Bottom-up | Brilleman et al 2013  | UK      |
| Knee<br>osteoarthritis             | £223.97   | <input type="checkbox"/> | <input type="checkbox"/> | <input type="checkbox"/> | 2010      | Bottom-up | Chen et al 2012       | UK      |
| Endometrial<br>cancer              | £2471.21  | <input type="checkbox"/> | <input type="checkbox"/> | <input type="checkbox"/> | 2012-2013 | Bottom-up | Pennington et al 2016 | England |
| Breast cancer                      | £13295.53 | <input type="checkbox"/> | <input type="checkbox"/> | <input type="checkbox"/> | 2011-2012 | Bottom-up | Hall et al. (2015).   | UK      |

---

## Limitations

The main overall limitation of using costs from the literature is that the estimation methods vary significantly from one paper to another, and the inputs for each category of care are slightly different for each condition. When the estimates come from a bottom-up approach, the costs are likely to underestimate the true costs as the possible missing components are set to zero. When the estimates come from a top-down approach, the allocation rule is often not clear and it is hard to know how comparable they are to the true cost. Yet, the order of magnitude is likely to represent the true costs for the NHS, as the overall costs are broken down into parts. Furthermore, the authors often argue that their method is conservative and that the estimated costs represent lower-bound estimates.

## Utility weights

All utility weightings for use in QALY calculations were obtained from Sullivan et al's 2011 Catalogue of EQ-5D scores for the United Kingdom and NICE (20)

Males and females were allocated the same EQ-5D score, as this is not specified by gender in the publication. The diseases were mapped onto conditions listed in the publication using matching, or closest matching ICD9 and Clinical Classification Categories.

Table 5 - List of EQ-5D values allocated to males and females for each disease

| Disease             | Male  | Female | Source                        |
|---------------------|-------|--------|-------------------------------|
| Breast cancer       | N/A   | 0.749  | Sullivan et al. 2011(21)      |
| CHD                 | 0.76  | 0.76   | Laires et al. 2015 (22)       |
| Colorectal cancer   | 0.676 | 0.676  | Sullivan et al. 2011(21)      |
| Diabetes (Type 2)   | 0.661 | 0.661  | Sullivan et al. 2011(21)      |
| Endometrial cancer  | N/A   | 0.598  | Sullivan et al. 2011(21)      |
| Hypertension        | 0.721 | 0.721  | Sullivan et al. 2011(21)      |
| Knee Osteoarthritis | 0.49  | 0.46   | Conner-Spady et al. 2015 (23) |
| Oesophageal cancer  | 0.904 | 0.904  | Sullivan et al. 2011(21)      |
| Ovarian cancer      | N/A   | 0.848  | Sullivan et al. 2011(21)      |
| Pancreatic cancer   | 0.79  | 0.79   | Romanus et al. 2012 (24)      |
| Renal cancer        | 0.661 | 0.661  | Sullivan et al. 2011(21)      |
| Stroke              | 0.713 | 0.713  | Rivero-Arias et al. 2010 (25) |



## UKHF microsimulation methodology

### Microsimulation framework

Our simulation consists of two modules. The first module calculates the predictions of risk factor trends over time based on data from rolling cross-sectional studies. The second module performs the microsimulation of a virtual population, generated with demographic characteristics matching those of the observed data. The health trajectory of each individual from the population is simulated over time allowing them to contract, survive or die from a set of diseases or injuries related to the analysed risk factors. The detailed description of the two modules is presented below.

### Microsimulation Module one: Predictions of overweight/obesity over time

BMI was analysed within the model as risk factors (RF), as described in Table 6.

Table 6 Description of the categories used for BMI risk factors

| Risk factor (RF) | Number of categories (N) | Categories                                                                                                                                                                                                                                                                             |
|------------------|--------------------------|----------------------------------------------------------------------------------------------------------------------------------------------------------------------------------------------------------------------------------------------------------------------------------------|
| BMI              | 5                        | <ol style="list-style-type: none"> <li>1 Normal weight BMI &lt; 25 kg m<sup>-2</sup> (normal weight)</li> <li>2 Overweight BMI from 25 to 29.99 kg m<sup>-2</sup> (overweight)</li> <li>3 Obese BMI ≥ 30 kg m<sup>-2</sup> (obesity class I &amp; class II &amp; class III)</li> </ol> |

Let  $K$  be the number of categories for BMI, e.g.  $K = 3$  in this paper. Let  $k = 1, 2, \dots, K$  number these categories and  $p_k(t)$  denote the prevalence of individuals with BMI values that correspond to the category  $k$  at time  $t$ .

We estimate  $p_k(t)$  using multinomial logistic model with time  $t$  as a single explanatory variable. In the first step, for  $k > 1$ , we have

$$\ln \left( \frac{p_k(t)}{p_1(t)} \right) = a_k + b_k t \quad (0.1)$$

The prevalence of the third category,  $p_k(t)$ , is obtained by using the normalisation constraint

$\sum_{k=1}^K p_k(t) = 1$  Solving equation (0.1) for  $p_k(t)$ , we obtain

$$p_k(t) = \frac{\exp(a_k + b_k t)}{1 + \sum_{k=2}^K \exp(a_k + b_k t)}, \quad (0.2)$$

which is subjected to all constraints on the prevalence values, i.e. normalisation and [0, 1] bounds.

### Multinomial logistic regression for each risk factor

Measured data is extracted from the survey data set. They consist of sets of probabilities with their variances. Each set represents the probabilities of individuals of normal weight, overweight, obesity class I & class II and obesity class III at specific time values (i.e., the year of the survey). For any particular time the sum of these probabilities is unity.

Each data point is treated as a normally distributed random variable; together they are a set of N groups (number of years) of K probabilities  $\{\{t_i, \mu_{ki}, \sigma_{ki} \mid k \in [1, K]\} \mid i \in [1, N]\}$ , where  $t_i, \mu_{ki}, \sigma_{ki}$  denote the year of the survey, the mean probability of  $k$ -th BMI category of the year and its variance respectively.

The regression consists of fitting a set of logistic functions  $\{p_k(a, b, t) \mid k \in [1, K]\}$  to these data – one function for each k-value. At each time value the sum of these functions is unity. Thus, for example, when measuring obesity in the four states, the  $k = 1$  regression function represents the probability of being normal weight over time,  $k = 2$  the probability of being overweight,  $k = 3$  the probability of being of obesity class I & class II & class III.

$$S(\mathbf{a}, \mathbf{b}) = \frac{1}{2} \sum_{k=0}^{K-1} \sum_{i=0}^{N-1} \frac{(p_k(\mathbf{a}, \mathbf{b}; t_i) - \mu_{ki})^2}{\sigma_{ki}^2} \quad (0.2)$$

$$p_k(\mathbf{a}, \mathbf{b}, t) \equiv \frac{e^{A_k}}{1 + e^{A_1} + \dots + e^{A_{K-1}}}$$

$$\mathbf{a} \equiv (a_0, a_1, \dots, a_{K-1}), \quad \mathbf{b} \equiv (b_0, b_1, \dots, b_{K-1}) \quad (0.2)$$

$$A_0 \equiv 0, \quad A_k \equiv a_k + b_k t$$

The parameters  $A_0, a_0$  and  $b_0$  are all zero and are used merely to preserve the symmetry of the expressions and their manipulation. For a K-dimensional set of probabilities there will be  $2(K-1)$  regression parameters to be determined due to the normalisation constraint.

The minimum of the function S is determined from the equations

$$\frac{\partial S}{\partial a_j} = \frac{\partial S}{\partial b_j} = 0 \quad \text{for } j=1,2,\dots,k-1 \quad (0.2)$$

noting the relations

$$\begin{aligned} \frac{\partial p_k}{\partial A_j} &= \frac{\partial}{\partial A_j} \left( \frac{e^{A_k}}{1 + e^{A_1} + \dots + e^{A_{k-1}}} \right) = p_k \delta_{kj} - p_k p_j \\ \frac{\partial}{\partial a_j} &= \frac{\partial}{\partial A_j} \\ \frac{\partial}{\partial b_j} &= t \frac{\partial}{\partial A_j} \end{aligned} \quad (0.3)$$

The values of the vectors  $\mathbf{a}$ ,  $\mathbf{b}$  that satisfy these equations are denoted  $\hat{\mathbf{a}}$ ,  $\hat{\mathbf{b}}$  respectively. They provide the trend lines,  $p_k(\hat{\mathbf{a}}, \hat{\mathbf{b}}; t)$ , for the probabilities of each BMI category. The confidence intervals for the trend lines are derived most easily from the underlying Bayesian analysis of the problem.

### Bayesian interpretation

The  $(2K - 2)$  regression parameters  $\{\mathbf{a}, \mathbf{b}\}$  are regarded as random variables whose posterior distribution is proportional to the function  $\exp(-S(\mathbf{a}, \mathbf{b}))$ . The maximum likelihood estimate of this probability distribution function, the minimum of the function S, is obtained at the values  $\hat{\mathbf{a}}$ ,  $\hat{\mathbf{b}}$ . Other properties of the  $(2K - 2)$ -dimensional probability distribution function are obtained by first approximating it as a  $(2K - 2)$ -dimensional normal distribution whose mean is the maximum likelihood estimate. This amounts to expanding the function  $S(\mathbf{a}, \mathbf{b})$  in a Taylor series as far as terms quadratic in the differences  $(\mathbf{a} - \hat{\mathbf{a}})$ ,  $(\mathbf{b} - \hat{\mathbf{b}})$  about the maximum likelihood estimate  $\hat{\mathbf{S}} \equiv S(\hat{\mathbf{a}}, \hat{\mathbf{b}})$ .

Hence

$$\begin{aligned}
 S(\mathbf{a}, \mathbf{b}) &= \frac{1}{2} \sum_{k=0}^{K-1} \sum_{i=0}^{N-1} \frac{(p_k(\mathbf{a}, \mathbf{b}; t_i) - \mu_{ki})^2}{\sigma_{ki}^2} \\
 &\equiv S(\hat{\mathbf{a}}, \hat{\mathbf{b}}) + \frac{1}{2} (a - \hat{a}, b - \hat{b}) P^{-1} (a - \hat{a}, b - \hat{b}) + \dots \\
 &\approx S(\hat{\mathbf{a}}, \hat{\mathbf{b}}) + \frac{1}{2} \sum_{i,j} (a_i - \hat{a}_i) \frac{\partial^2 \hat{S}}{\partial \hat{a}_i \partial \hat{a}_j} (a_j - \hat{a}_j) + \frac{1}{2} \sum_{i,j} (a_i - \hat{a}_i) \frac{\partial^2 \hat{S}}{\partial \hat{a}_i \partial \hat{b}_j} (b_j - \hat{b}_j) + \\
 &\quad + \frac{1}{2} \sum_{i,j} (b_i - \hat{b}_i) \frac{\partial^2 \hat{S}}{\partial \hat{b}_i \partial \hat{a}_j} (a_j - \hat{a}_j) + \frac{1}{2} \sum_{i,j} (b_i - \hat{b}_i) \frac{\partial^2 \hat{S}}{\partial \hat{b}_i \partial \hat{b}_j} (b_j - \hat{b}_j)
 \end{aligned} \tag{0.3}$$

The  $(2K - 2)$ -dimensional covariance matrix  $P$  is the inverse of the appropriate expansion coefficients. This matrix is central to the construction of the confidence limits for the trend lines.

### Estimation of the confidence intervals

The logistic regression functions  $p_k(t)$  can be approximated as a normally distributed time-varying random variable  $N(\hat{p}_k(t), \sigma_k^2(t))$  by expanding  $p_k$  about its maximum likelihood estimate (the trend

line)  $\hat{p}_k(t) = p(\hat{\mathbf{a}}, \hat{\mathbf{b}}, t)$

$$\begin{aligned}
 p_k(\mathbf{a}, \mathbf{b}, t) &= p_k(\hat{\mathbf{a}} + \mathbf{a} - \hat{\mathbf{a}}, \hat{\mathbf{b}} + \mathbf{b} - \hat{\mathbf{b}}, t) \\
 &= \hat{p}_k(t) + (\nabla_{\hat{\mathbf{a}}}, \nabla_{\hat{\mathbf{b}}}) \hat{p}_k(t) \begin{pmatrix} \mathbf{a} - \hat{\mathbf{a}} \\ \mathbf{b} - \hat{\mathbf{b}} \end{pmatrix} + \dots
 \end{aligned} \tag{0.3}$$

Denoting mean values by angled brackets, the variance of  $p_k$  is thereby approximated as

$$\begin{aligned}
 \sigma_k^2(t) &\equiv \left\langle (p_k(\mathbf{a}, \mathbf{b}, t) - \hat{p}_k(t))^2 \right\rangle = (\nabla_{\hat{\mathbf{a}}} \hat{p}_k(t), \nabla_{\hat{\mathbf{b}}} \hat{p}_k(t)) \left\langle \begin{pmatrix} \mathbf{a} - \hat{\mathbf{a}} \\ \mathbf{b} - \hat{\mathbf{b}} \end{pmatrix} \begin{pmatrix} \mathbf{a} - \hat{\mathbf{a}} \\ \mathbf{b} - \hat{\mathbf{b}} \end{pmatrix}^T \right\rangle \times \\
 &\quad (\nabla_{\hat{\mathbf{a}}} \hat{p}_k(t), \nabla_{\hat{\mathbf{b}}} \hat{p}_k(t))^T = (\nabla_{\hat{\mathbf{a}}} \hat{p}_k(t), \nabla_{\hat{\mathbf{b}}} \hat{p}_k(t)) P (\nabla_{\hat{\mathbf{a}}} \hat{p}_k(t), \nabla_{\hat{\mathbf{b}}} \hat{p}_k(t))^T
 \end{aligned} \tag{0.3}$$

When  $K = 3$  this equation can be written as the 4-dimensional inner product

$$\sigma_k^2(t) = \begin{pmatrix} \frac{\partial \hat{p}_k(t)}{\partial \hat{a}_1} & \frac{\partial \hat{p}_k(t)}{\partial \hat{a}_2} & \frac{\partial \hat{p}_k(t)}{\partial \hat{b}_1} & \frac{\partial \hat{p}_k(t)}{\partial \hat{b}_2} \end{pmatrix} \begin{bmatrix} P_{aa11} & P_{aa12} & P_{ab11} & P_{ab12} \\ P_{aa21} & P_{aa22} & P_{ab21} & P_{ab22} \\ P_{ba11} & P_{ba12} & P_{bb11} & P_{bb12} \\ P_{ba21} & P_{ba22} & P_{bb21} & P_{bb22} \end{bmatrix} \begin{pmatrix} \frac{\partial \hat{p}_k(t)}{\partial \hat{a}_1} \\ \frac{\partial \hat{p}_k(t)}{\partial \hat{a}_2} \\ \frac{\partial \hat{p}_k(t)}{\partial \hat{b}_1} \\ \frac{\partial \hat{p}_k(t)}{\partial \hat{b}_2} \end{pmatrix} \tag{0.3}$$

where  $P_{cdij} \equiv \langle (c_i - \hat{c}_i)(d_j - \hat{d}_j) \rangle$ . The 95% confidence interval for  $p_k(t)$  is centred given as  $[\hat{p}_k(t) - 1.96\sigma_k(t), \hat{p}_k(t) + 1.96\sigma_k(t)]$ .

## Module two: Microsimulation model

### Microsimulation initialisation: birth, disease and death models

Simulated people are generated with the correct demographic statistics in the simulation's start-year. In this year women are stochastically allocated the number and years of birth of their children – these are generated from known fertility and mother's age at birth statistics (valid in the start-year). If a woman has children then those children are generated as members of the simulation in the appropriate birth year.

The microsimulation is provided with a list of BMI-related diseases. These diseases used the best available incidence, mortality, survival, relative risk and prevalence statistics (by age and gender). Individuals in the model are simulated from the start year of the simulation. In the course of their lives, simulated people can die from one of the diseases caused by BMI that they might have acquired or from some other cause(s). The probability that a person of a given age and gender dies from a cause other than the disease are calculated in terms of known death and disease statistics valid in the start-year. It is constant over the course of the simulation.

The microsimulation incorporates a sophisticated economic module. The module employs a Markov-type simulation of long-term health benefits and health care costs. It synthesises and estimates evidence on cost-utility analysis. The model is used to project the differences in quality-adjusted life years (QALYs), direct lifetime health-care costs, adult productivity costs, Lifetime Income Losses costs, total disability-adjusted life years (DALY) and incremental cost-effectiveness ratio over a specified time scale. The direct healthcare costs are presented separately in terms of hospital admissions, general practitioner costs, medication costs and social care costs. Adult productivity costs are presented as absenteeism costs incurred each year or income losses due to premature mortality each year. Lifetime Income Losses costs each year is the proportion of lifetime income lost due to individuals being overweight or obese in childhood. Outputs can be discounted for any specific discount rate.

This following section provides an overview of the main assumptions of the model.

### Population models

Populations are implemented as instances of the TPopulation C++ class. The TPopulation class is created from a population (\*.ppl) file. Usually a simulation will use only one population but it can

simultaneously process multiple populations (for example, different ethnicities within a national population).

**Population Editor**

The Population Editor Allows editing and testing of TPopulation objects. The population is created in the start-year and propagated forwards in time. An example population pyramid which can be used when initialising the model is shown in Figure 1 shows the population distribution for England in 2016 used in the initialisation of the model.

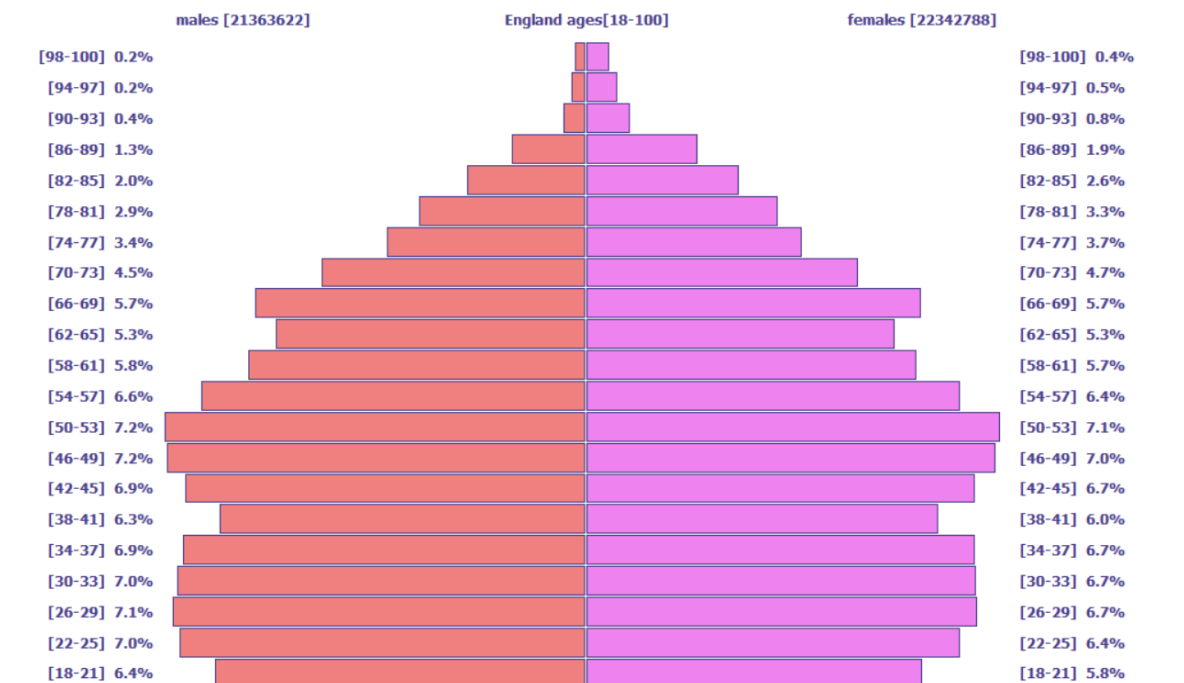

**Figure 1 Population pyramid for England in 2016**

People within the model can die from specific diseases or from other causes. A disease file is created within the program to represent deaths from other causes. The following distributions are required by the population editor (Table 7).

Table 7 Summary of the parameters representing the distribution component

| Distribution name  | symbol   | note                                                  |
|--------------------|----------|-------------------------------------------------------|
| MalesByAgeByYear   | $p_m(a)$ | Input in year0 – probability of a male having age a   |
| FemalesByAgeByYear | $p_f(a)$ | Input in year0 – probability of a female having age a |

**Deaths from modelled diseases**

The simulation models any number of specified diseases some of which may be fatal. In the start year the simulation's death model uses the diseases' own mortality statistics to adjust the probabilities of death by age and gender. In the start year the net effect is to maintain the same probability of death by age and gender as before; in subsequent years, however, the rates at which people die from modelled diseases will change as modelled risk factors change.

### The risk factor model

The distribution of risk factors (RF) in the population is estimated using regression analysis stratified by both sex  $S = \{\text{male, female}\}$  and age group  $A = \{0-4, 5-9, \dots, 70-74, 75+\}$ . The fitted trends are extrapolated to forecast the distribution of each RF category in the future. For each sex-and-age-group stratum, the set of cross-sectional, time-dependent, discrete distributions  $D = \{p_k(t) \mid k = 1, \dots, N; t > 0\}$ , is used to manufacture RF trends for individual members of the population. Each BMI is modelled as a continuous risk factor.

### Continuous risk factors

In the case of a continuous RF, for each discrete distribution  $D$  there is a continuous counterpart. Let  $\beta$  denote the RF value in the continuous scale and let  $f(\beta \mid A, S, t)$  be the probability density function of  $\beta$  for age group  $A$  and sex  $S$  at time  $t$ . Then

$$p_k(t \mid A, S) = \int_{\beta \in k} f(\beta \mid A, S, t) d\beta. \quad (0.4)$$

Equations (0.2) and (0.4) both refer to the same quantity. However, equation (0.4) uses the definition of the probability density function to express the age-and-sex-specific percentage of individuals in RF category  $k$  at time  $t$ . Equation (0.2) gives an estimate of this quantity using equation (0.1) for all  $k = 0, \dots, N$ . The cumulative distribution function of  $\beta$  is

$$F(\beta \mid A, S, t) = \int_0^{\beta} f(\beta \mid A, S, t) d\beta. \quad (0.5)$$

At time  $t$ , a person with sex  $S$  belonging to the age group  $A$  is said to be on the  $p$ -th percentile of this distribution if  $F(\beta \mid A, S, t) = p/100$ . Given the cross-sectional information from the set of distributions  $D$ , it is possible to simulate longitudinal trajectories by forming pseudo-cohorts within the population. A key requirement for these sets of longitudinal trajectories is that they reproduce the cross-sectional distribution of RF categories for any year with available data. The method adopted here and in our earlier work is based on the assumption that person's RF value changes throughout their lives in such a

way that they always have the same associated percentile rank. As they age, individuals move from one age group to another and their RF value changes so that they have the same percentile rank but of a different RF distribution. Crucially it meets the important condition that the cross-sectional RF distributions obtained by simulation match the RF distributions of the observed data.

The above procedure can be explained using the example of the NO<sub>2</sub> distribution. The NO<sub>2</sub> distributions are known for the population stratified by sex and age for all years of the simulation (by extrapolation of fitted model, see equation (0.1)). A person who is in age group  $A$  and who grows ten years older will at some time move into the next age group  $A'$  and will have a BMI that was described first by the distribution  $f(\beta | A, S, t)$  and then at the later time  $t'$  by the distribution  $f(\beta | A', S, t')$ . If the BMI of that individual is on the  $p$ -th percentile of the BMI distribution, their BMI will change from  $\beta$  to  $\beta'$  so that

$$\beta = F^{-1}\left(\frac{p}{100} | A, S, t\right) \quad (0.6)$$

$$\beta' = F^{-1}\left(\frac{p}{100} | A', S, t'\right) \Rightarrow \beta' = F^{-1}(F(\beta | A, S, t) | A', S, t') \quad (0.7)$$

Where  $F^{-1}$  is the inverse of the cumulative distribution function of  $\beta$ , which we model with a continuous uniform distribution within the RF categories (see Table 6). Equation (0.7) guarantees that the transformation taking the random variable  $\beta$  to  $\beta'$  ensures the correct cross-sectional distribution at time  $t'$ .

The microsimulation first generates individuals from the RF distributions of the set  $D$  and, once generated, grows the individual's RF in a way that is also determined by the set  $D$ . It is possible to implement equation (0.7) as a suitably fast algorithm.

### Relative risks

Suppose that  $\alpha$  is a risk factor state of some risk factor  $A$  and denote by  $p_A(d | \alpha, a, s)$  the incidence probability for the disease  $d$  given the risk state,  $\alpha$ , the person's age,  $a$ , and gender,  $s$ . The relative risk  $\rho_A$  is defined by equation (0.7).

$$\begin{aligned} p_A(d | \alpha, a, s) &= \rho_{A|d}(\alpha | a, s) p_A(d | \alpha_0, a, s) \\ \rho_{A|d}(\alpha_0 | a, s) &\equiv 1 \end{aligned} \quad (0.7)$$



Where  $\alpha_0$  is the zero risk state.

The incidence probabilities, as reported, can be expressed in terms of the equation,

$$\begin{aligned} p(d|a,s) &= \sum_{\alpha} p_A(d|\alpha,a,s)\pi_A(\alpha|a,s) \\ &= p_A(d|\alpha_0,a,s)\sum_{\alpha} \rho_{A|d}(\alpha|a,s)\pi_A(\alpha|a,s) \end{aligned} \quad (0.7)$$

Combining these equations allows the conditional incidence probabilities to be written in terms of known quantities

$$p(d|\alpha,a,s) = \rho_{A|d}(\alpha|a,s) \frac{p(d|a,s)}{\sum_{\beta} \rho_{A|d}(\beta|a,s)\pi_A(\alpha|a,s)} \quad (0.7)$$

Previous to any series of Monte Carlo trials the microsimulation program pre-processes the set of diseases and stores the *calibrated* incidence statistics  $p_A(d|a_0,a,s)$ . These incidence statistics are calibrated to national level data sets for both national level and local authority model simulations. In this project the risk factor distributions and incidence risks for England are used to calculate the calibrated risks.

### Modelling diseases

Disease modelling relies heavily on the sets of incidence, mortality, survival, relative risk and prevalence statistics. In some cases where a data set is unavailable or not available is the specified form for the model, data has been approximated from the known sets of the data.

The microsimulation uses risk dependent incidence statistics and these are inferred from the relative risk statistics and the distribution of the risk factor within the population. In the simulation, individuals are assigned a risk factor trajectory giving their personal risk factor history for each year of their lives. Their probability of getting a particular risk factor related disease in a particular year will depend on their risk factor state in that year.

Once a person has a fatal disease (or diseases) their probability of survival will be controlled by a combination of the disease-survival statistics and the probabilities of dying from other causes. Disease survival statistics are modelled as age and gender dependent exponential distributions.

### Mortality statistics

In any year, in some population, in a sample of  $N$  people who have the disease a subset  $N_{\omega}$  will die from the disease.

Mortality statistics record the cross sectional probabilities of death as a result of the disease – possibly stratifying by age

$$P_{\omega} = \frac{N_{\omega}}{N} \quad (0.8)$$

Within some such subset  $N_{\omega}$  of people that die in that year from the disease, the distribution by year-of-disease is not usually recorded. This distribution would be most useful. Consider two important idealised, special cases

Suppose the true probabilities of dying in the years after some age  $a_0$  are  $\{p_{\omega 0}, p_{\omega 1}, p_{\omega 2}, p_{\omega 3}, p_{\omega 4}\}$ . The probability of being alive after  $N$  years is simply that you don't die in each year

$$P_{survive}(a_0 + N) = (1 - p_{\omega 0})(1 - p_{\omega 1})(1 - p_{\omega 2}) \dots (1 - p_{\omega N-1}) \quad (0.9)$$

### Survival rates

It is common practice to describe survival in terms of a survival rate  $R$ . supposing an exponential death-distribution. In this formulation the probability of surviving  $t$  years from some time  $t_0$  is given as

$$P_{survival}(t) = 1 - R \int_0^t du e^{-Ru} = e^{-Rt} \quad (0.10)$$

For a time period of 1 year

$$\begin{aligned} P_{survival}(1) &= e^{-R} \\ \Rightarrow \\ R &= -\ln(P_{survival}(1)) = -\ln(1 - p_{\omega}) \end{aligned} \quad (0.11)$$

For a time period of, for example, 4 years,

$$P_{survival}(t = 4) = 1 - R^{-1} \int_0^4 du e^{-Ru} = e^{-4R} = (1 - p_{\omega})^4 \quad (0.12)$$

In short, the Rate is minus the natural log of the 1-year survival probability.

### The survival models

For any potentially terminal disease the model can use any of the three survival models, numbered ((0, 1, 2)). The parameters describing these models are given below.

### Survival model 0

A single probability of dying  $\{p_{\omega 0}\}$ , where  $p_{\omega 0}$  is valid for all years. Given the 1-year survival probability

$$P_{survival}(1)$$

The model uses 1 parameter ((R))

$$R = -\ln(P_{survival}(1)) \quad (0.13)$$

### Survival model 1

Two different probabilities of dying  $\{p_{\omega 0}, p_{\omega 1}\}$ , where  $p_{\omega 0}$  is valid for the first year;  $p_{\omega 1}$  thereafter. The

model uses two parameters  $(p_1, R)$ . Given the 1-year survival probability  $P_{survival}(1)$  and the 5-year

survival probability  $P_{survival}(5)$

$$\begin{aligned} p_1 &= 1 - P_{survival}(1) \\ R &= -\frac{1}{4} \ln\left(\frac{P_{survival}(5)}{P_{survival}(1)}\right) \end{aligned} \quad (0.14)$$

### Survival model 2

Three different probabilities of dying  $\{p_{\omega 0}, p_{\omega 1}, p_{\omega 5}\}$ , where  $p_{\omega 0}$  is valid for the first year;  $p_{\omega 1}$  for the

second to the fifth year;  $p_{\omega 5}$  thereafter. The model uses three parameters  $(p_1, R, R_{>5})$

Given the 1-year survival probability  $P_{survival}(1)$  and the 5-year survival probability  $P_{survival}(5)$

$$\begin{aligned} p_1 &= 1 - P_{survival}(1) \\ R &= -\frac{1}{4} \ln\left(\frac{P_{survival}(5)}{P_{survival}(1)}\right) \\ R_{>5} &= -\frac{1}{5} \ln\left(\frac{P_{survival}(10)}{P_{survival}(5)}\right) \end{aligned} \quad (0.15)$$

Remember that different probabilities will apply to different age and gender groups. Typically the data might be divided into 10 year age groups.

### Approximating missing disease statistics

A number of tools have been developed in the model in order to compute missing disease statistics data such as incidence or prevalence.

### Approximating survival data from mortality and prevalence

An example is provided here with a standard life-table analysis for a disease  $d$ .

Consider the 4 following states:

| state | Description               |
|-------|---------------------------|
| 0     | alive without the disease |
| 1     | alive with the disease    |
| 2     | dead from the disease     |
| 3     | dead from other diseases  |

$p_{ik}$  is the probability of the disease incidence at aged  $k$

$p_{ok}$  is the probability of dying from the at aged  $k$

$p_{\bar{ok}}$  is the probability of dying other than from the disease at aged  $k$

The state transition matrix is constructed as follows

$$\begin{bmatrix} p_0(k+1) \\ p_1(k+1) \\ p_2(k+1) \\ p_3(k+1) \end{bmatrix} = \begin{bmatrix} (1-p_{\bar{ok}})(1-p_{ik}) & (1-p_{\bar{ok}}-p_{ok})p_{ok} & 0 & 0 \\ (1-p_{\bar{ok}})p_{ik} & (1-p_{\bar{ok}}-p_{ok})(1-p_{ok}) & 0 & 0 \\ 0 & p_{ok} & 1 & 0 \\ p_{\bar{ok}} & p_{\bar{ok}} & 0 & 1 \end{bmatrix} \begin{bmatrix} p_0(k) \\ p_1(k) \\ p_2(k) \\ p_3(k) \end{bmatrix} \quad (0.16)$$

The disease mortality equation is that for state-2,

$$p_2(k+1) = p_{ok}p_1(k) + p_2(k) \quad (0.17)$$

The probability of dying from the disease in the age interval  $[k, k+1]$  is  $p_{ok}p_1(k)$  - this is otherwise the (cross-sectional) disease mortality,  $p_{mor}(k)$ .  $p_1(k)$  is otherwise known as the disease prevalence,

$p_{pre}(k)$ . Hence the relation

$$p_{ok} = \frac{p_{mor}(k)}{p_{pre}(k)} \quad (0.18)$$

For exponential survival probabilities the probability of dying from the disease in the age-interval  $[k, k+1]$  is denoted by  $p_{ok}$  and is given by the formula

$$p_{ok} = 1 - e^{-R_k} \Rightarrow R_k = -\ln(1 - p_{ok}) \quad (0.19)$$

When, as is the case for most cancers, these survival probabilities are known the microsimulation will use them, when they are not known or are too old to be any longer of any use, the microsimulation uses survival statistics inferred from the prevalence and mortality statistics (equation (0.18)). An alternative derivation equation (0.18) is as follows. Let  $N_k$  be the number of people in the population aged  $k$  and let  $n_k$  be the number of people in the population aged  $k$  with the disease. Then, the number of deaths from the disease of people aged  $k$  can be given in two ways: as  $p_{ok}n_k$  and, equivalently, as  $p_{mor}(k)N_k$ . Observing that the disease prevalence is  $n_k / N_k$  leads to the equation

$$\begin{aligned} p_{ok}n_k &= p_{mor}(k)N_k \\ p_{pre}(k) &= \frac{n_k}{N_k} \\ \Rightarrow p_{ok} &= \frac{p_{mor}(k)}{p_{pre}(k)} \end{aligned} \quad (0.20)$$

### Approximating disease incidence from prevalence

The algorithm estimates the probability of contracting a disease given age and sex,  $\hat{p}(d | a, s)$  from prevalence rates, survival rates and mortality rates.

Step 1: State transition matrix of the algorithm

$$\begin{pmatrix} p_{\bar{d}}(a+1 | s) \\ p_{d1}(a+1 | s) \\ p_d(a+1 | s) \\ p_{dead}(a+1 | s) \end{pmatrix} = \begin{pmatrix} (1 - p_{\bar{w}}(a | s))(1 - \hat{p}(d | a, s)) & 0 & 0 & 0 \\ (1 - p_{\bar{w}}(a | s))\hat{p}(d | a, s) & 0 & 0 & 0 \\ 0 & 1 - p_{w1+\bar{w}1}(a | s) & 1 - p_{w+\bar{w}}(a | s) & 0 \\ p_{\bar{w}}(a | s) & p_{w1+\bar{w}1}(a | s) & p_{w+\bar{w}}(a | s) & 1 \end{pmatrix} \begin{pmatrix} p_{\bar{d}}(a | s) \\ p_{d1}(a | s) \\ p_d(a | s) \\ p_{dead}(a | s) \end{pmatrix} \quad (0.21)$$

The probability of being in a set of states:

|       |                      |                                                           |
|-------|----------------------|-----------------------------------------------------------|
| $S_0$ | $p_{\bar{d}}(a   s)$ | The probability of being alive without disease at age $a$ |
|-------|----------------------|-----------------------------------------------------------|

|       |                   |                                                                                             |
|-------|-------------------|---------------------------------------------------------------------------------------------|
| $S_1$ | $p_{d1}(a   s)$   | The probability of being alive with new disease (contracting within a year) at age $a$      |
| $S_2$ | $p_d(a   s)$      | The probability of being alive with old disease at age $a$                                  |
| $S_3$ | $p_{dead}(a   s)$ | The probability of being dead for any reason (from the disease or other reasons) at age $a$ |

$\hat{p}(d | a, s)$  The estimated incidence probability at age of  $a$  given sex type  $s$ .

$p_{\bar{w}}(a | s)$  The probability of dying from other causes at age of  $a$  given sex type  $s$ .

$p_{w1+\bar{w}1}(a | s)$  The probability of dying from any reason within the first years of contracting the disease at the age of  $a$  given sex type  $s$ .

$p_{w+\bar{w}}(a | s)$  The probability of dying from any reasons after the first years of contracting the disease at the age  $a$  given sex type  $s$ .

$p_{survival1st}(a | s)$  The probability of surviving the first year after contracting the disease at the age of  $a$  given sex type  $s$ .

$p_{survival1}(a | s)$  The probability of surviving the year at the age of  $a$  given sex type  $s$ .

Step 2: The prevalence for a particular age group

Estimated prevalence rate can be expressed by,

$$\hat{P}_{pre\_mean}(agegroup | s) = \frac{\sum_{\min\_a}^{\max\_a} \hat{P}_{pre}(a | s) \cdot \pi(a | s)}{\sum_{\min\_a}^{\max\_a} \pi(a | s)} \quad (0.22)$$

where

$$\hat{P}_{pre}(a | s) = \frac{p_d(a | s) + p_{d1}(a | s)}{p_d(a | s) + p_{d1}(a | s) + p_{\bar{d}}(a | s)} \quad (0.23)$$

where  $\min\_a$  is the youngest age in that age group and  $\max\_a$  the oldest.  $\pi(a | s)$  is the population distribution stratified by age given sex.

Step 3: Regression

We have two algorithms to find the optimum value of  $\hat{p}(d | a, s)$ : simplex algorithm and cauchy algorithm. Simplex algorithm finds an optimum set of incidence rates of all age groups by minimising the

distance between the estimated global prevalence rate and the actual global prevalence rate, shown in (1.37). We use simplex algorithm for most diseases as it is faster.

$$\arg \min_{\hat{p}(d|a,s)} S = \arg \min_{\hat{p}(d|a,s)} S \left( \sum_{age\_group} (P_{pre\_mean}(agegroup | s) - \hat{P}_{pre\_mean}(agegroup | s)) \right) \quad (0.24)$$

Cauchy algorithm finds an optimum incidence rate for each individual age group by minimising the distance between the estimated prevalence rate and the actual prevalence rate of the age group, shown in (0.25). We use Cauchy algorithm for diseases which are associated to certain age groups, e.g., dementia which is only associated to people older than 60.

$$\arg \min_{\hat{p}(d|a,s)} S = \arg \min_{\hat{p}(d|a,s)} S \left( P_{pre\_mean}(agegroup | s) - \hat{P}_{pre\_mean}(agegroup | s) \right) \quad (0.26)$$

## References

1. Statistics OfN. Population Estimates for UK, England and Wales, Scotland and Northern Ireland: mid-2016. 2017.
2. Office for National Statistics. Deaths registered in England and Wales: 2015. 2016.
3. Scotland NRo. Deaths, by sex and single year of age, Scotland 1974 to 2016. Deaths Time Series Data2017.
4. Agency NISaR. Deaths by single year of age, 1955 to 2015. 2017.
5. Ahern AL, Aveyard PN, Halford JC, Mander A, Cresswell L, Cohn SR, et al. Weight loss referrals for adults in primary care (WRAP): protocol for a multi-centre randomised controlled trial comparing the clinical and cost-effectiveness of primary care referral to a commercial weight loss provider for 12 weeks, referral for 52 weeks, and a brief self-help intervention [ISRCTN82857232]. *BMC public health*. 2014;14(1):620.
6. British Heart Foundation. Cardiovascular Disease Statistics 2014. 2015.
7. Arthritis Research UK. Musculoskeletal Calculator 2016. Available from: <http://www.arthritisresearchuk.org/arthritis-information/data-and-statistics/musculoskeletal-calculator.aspx>.
8. Zheng H, Chen C. Body mass index and risk of knee osteoarthritis: systematic review and meta-analysis of prospective studies. *BMJ open*. 2015;5(12):e007568.
9. British Heart Foundation. Stroke Statistics 2009. 2009.
10. World Obesity Federation. Relative risk Assessments IASO; Prepared for DYNAMO-HIA project. Available from: [http://www.worldobesity.org/site\\_media/uploads/Appendix\\_Relative\\_Risk\\_Assessments\\_IASO.pdf](http://www.worldobesity.org/site_media/uploads/Appendix_Relative_Risk_Assessments_IASO.pdf); <http://www.worldobesity.org/what-we-do/policy-prevention/projects/eu-projects/dynamohiaproject/estimatesrrperunitbmi/>.
11. Statistics OfN. Cancer registration statistics, England. ONS; 2015.
12. Smolina K, Wright FL, Rayner M, Goldacre MJ. Determinants of the decline in mortality from acute myocardial infarction in England between 2002 and 2010: linked national database study. Corrected data on incidence and mortality in 2013 at <http://www.bmj.com/content/347/bmj.f7379.abstract>. *BMJ*. 2012;344:d8059.
13. Dr. Craig Currie at Cardiff University.
14. NHS Digital. National Diabetes Audit 2015/2016 NHS Digital2017. Available from: <http://www.content.digital.nhs.uk/catalogue/PUB23241>.
15. Health and Social Care Information Centre. Health Survey for England - 2014 - Trend Tables. Available from <http://www.hscic.gov.uk/catalogue/PUB19297>. 2015.
16. Office for National Statistics. Cancer Survival in England: adults diagnosed between 2011 and 2015 and followed up to 2016. 2017.
17. National Health Service. Health Investment Networks 2012-13 Programme Budgeting data 2016. Available from: <https://www.networks.nhs.uk/nhs-networks/health-investment-network/news/2012-13-programme-budgeting-data-is-now-available>.
18. International Diabetes F. IDF Diabetes Atlas 6th Edition 2014 2014. Available from: [https://www.idf.org/sites/default/files/Atlas-poster-2014\\_EN.pdf](https://www.idf.org/sites/default/files/Atlas-poster-2014_EN.pdf).
19. Oxford Economics. The economic cost of arthritis for the UK economy - Final report. 2010.
20. Roberta Ara AW. NICE DSU technical support document 12: the use of health state utility values in decision models. 2011.
21. Patrick W. Sullivan JFS, Mark J. Sculpher, Vahram Ghushchyan. Catalogue of EQ-5D Scores for the United Kingdom. *Medical Decision Making*. 2011;31(6):800-4.
22. Laires PA, Ejzykowicz F, Hsu TY, Ambegaonkar B, Davies G. Cost-effectiveness of adding ezetimibe to atorvastatin vs switching to rosuvastatin therapy in Portugal. *J Med Econ*. 2015;18(8):565-72.
23. Conner-Spady BL, Marshall DA, Bohm E, Dunbar MJ, Loucks L, Al Khudairy A, et al. Reliability and validity of the EQ-5D-5L compared to the EQ-5D-3L in patients with osteoarthritis referred for hip and knee replacement. *Qual Life Res*. 2015;24(7):1775-84.
24. Romanus D, Kindler HL, Archer L, Basch E, Niedzwiecki D, Weeks J, et al. Does health-related quality of life improve for advanced pancreatic cancer patients who respond to



gemcitabine? Analysis of a randomized phase III trial of the cancer and leukemia group B (CALGB 80303). *J Pain Symptom Manage.* 2012;43(2):205-17.

25. Rivero-Arias O, Ouellet M, Gray A, Wolstenholme J, Rothwell PM, Luengo-Fernandez R. Mapping the modified Rankin scale (mRS) measurement into the generic EuroQol (EQ-5D) health outcome. *Med Decis Making.* 2010;30(3):341-54.
