# Supplementary material for: Cost-effectiveness of bariatric surgery and non-surgical weight management programmes for adults with severe obesity: a decision analysis model
Source: PubMed Central journal article supplement (PMC8455321; doi:10.1038/s41366-021-00849-8), 2021-06-04
Supplement: 41366_2021_849_MOESM3_ESM.pdf [file 41366_2021_849_MOESM3_ESM.pdf]

**Table S1 Cost-effectiveness sensitivity analyses around time horizon and discount rate**

| Intervention                               | Intervention cost (£m/100k population) | Obesity disease cost (£m/100k population) | Total cost (£m/100k population) | Total QALY per 100k population | Multiple treatment comparison |            |                                  | ICER vs. baseline |
|--------------------------------------------|----------------------------------------|-------------------------------------------|---------------------------------|--------------------------------|-------------------------------|------------|----------------------------------|-------------------|
|                                            |                                        |                                           |                                 |                                | Inc. Costs                    | Inc. QALYS | ICER (vs. next best alternative) |                   |
| <b>0% Discounting of costs and QALYs</b>   |                                        |                                           |                                 |                                |                               |            |                                  |                   |
| Baseline                                   | £0                                     | £3,714                                    | £3,714                          | 1,345,761                      | Dominated                     | Dominated  | Dominated                        | --                |
| WMP1                                       | £94                                    | £3,603                                    | £3,697                          | 1,370,416                      | --                            | --         | --                               | Dominant          |
| VLCD added to WMP1                         | £220                                   | £3,600                                    | £3,820                          | 1,371,637                      | Dominated                     | Dominated  | Dominated                        | £4,110            |
| WMP2                                       | £137                                   | £3,581                                    | £3,718                          | 1,374,914                      | £21                           | 4,498      | £4,708                           | £146              |
| Look AHEAD                                 | £928                                   | £3,522                                    | £4,450                          | 1,386,615                      | Ext Dom.                      | Ext Dom.   | Ext Dom.                         | £18,014           |
| RYGB Surgery                               | £2,257                                 | £2,899                                    | £5,156                          | 1,532,976                      | £1,437                        | 158,062    | £9,094                           | £7,701            |
| <b>3.5% Discounting of costs and QALYs</b> |                                        |                                           |                                 |                                |                               |            |                                  |                   |
| Baseline                                   | £0                                     | £2,151                                    | £2,151                          | 930,221                        |                               |            |                                  |                   |
| WMP1                                       | £93                                    | £2,091                                    | £2,184                          | 943,960                        | £33                           | 13,739     | £2,379                           | £2,379            |
| VLCD added to WMP1                         | £219                                   | £2,089                                    | £2,308                          | 944,781                        | Dominated                     | Dominated  | Dominated                        | £10,774           |
| WMP2                                       | £132                                   | £2,079                                    | £2,211                          | 946,423                        | Ext Dom.                      | Ext Dom.   | Ext Dom.                         | £3,726            |
| Look AHEAD                                 | £842                                   | £2,050                                    | £2,892                          | 952,437                        | Ext Dom.                      | Ext Dom.   | Ext Dom.                         | £33,354           |
| RYGB Surgery                               | £1,798                                 | £1,736                                    | £3,534                          | 1,027,562                      | £1,350                        | 83,602     | £16,151                          | £14,207           |
| <b>6% Discounting of costs and QALYs</b>   |                                        |                                           |                                 |                                |                               |            |                                  |                   |
| Baseline                                   | £0                                     | £1,556                                    | £1,556                          | 751,490                        | --                            | --         | --                               | --                |
| WMP1                                       | £92                                    | £1,515                                    | £1,607                          | 761,029                        | £51                           | 9,539      | £5,362                           | £5,362            |
| VLCD added to WMP1                         | £218                                   | £1,513                                    | £1,731                          | 761,679                        | Dominated                     | Dominated  | Dominated                        | £17,245           |
| WMP2                                       | £129                                   | £1,507                                    | £1,636                          | 762,706                        | Ext Dom.                      | Ext Dom.   | Ext Dom.                         | £7,166            |
| Look AHEAD                                 | £790                                   | £1,489                                    | £2,279                          | 766,619                        | Ext Dom.                      | Ext Dom.   | Ext Dom.                         | £47,801           |
| RYGB Surgery                               | £1,605                                 | £1,285                                    | £2,889                          | 815,451                        | £1,282                        | 54,422     | £23,565                          | £20,851           |
| <b>5 year time horizon</b>                 |                                        |                                           |                                 |                                |                               |            |                                  |                   |
| Baseline                                   | £0                                     | £388                                      | £388                            | 319,023                        | --                            | --         | --                               | --                |
| WMP1                                       | £94                                    | £384                                      | £477                            | 320,030                        | £89                           | 1,007      | £88,689                          | £88,689           |
| WMP2                                       | £135                                   | £383                                      | £518                            | 320,037                        | Ext Dom.                      | Ext Dom.   | Ext Dom.                         | £128,511          |
| VLCD added to WMP1                         | £220                                   | £383                                      | £603                            | 320,256                        | £125                          | 226        | £555,265                         | £174,209          |
| Look AHEAD                                 | £641                                   | £383                                      | £1,024                          | 320,295                        | Ext Dom.                      | Ext Dom.   | Ext Dom.                         | £500,024          |
| RYGB Surgery                               | £1,172                                 | £366                                      | £1,537                          | 320,665                        | £935                          | 409        | £2,285,770                       | £700,171          |

|                             |                                        |                                           |                                 |                                | Multiple treatment comparison |            |                                  |                   |
|-----------------------------|----------------------------------------|-------------------------------------------|---------------------------------|--------------------------------|-------------------------------|------------|----------------------------------|-------------------|
| Intervention                | Intervention cost (£m/100k population) | Obesity disease cost (£m/100k population) | Total cost (£m/100k population) | Total QALY per 100k population | Inc. Costs                    | Inc. QALYS | ICER (vs. next best alternative) | ICER vs. baseline |
| <b>10 year time horizon</b> |                                        |                                           |                                 |                                |                               |            |                                  |                   |
| Baseline;                   | £0                                     | £804                                      | £804                            | 575,958                        | --                            | --         | --                               | --                |
| WMP1                        | £94                                    | £791                                      | £884                            | 579,578                        | £80                           | 3,620      | £21,975                          | £21,975           |
| VLCD added to WMP1          | £220                                   | £789                                      | £1,009                          | 580,047                        | Dominated                     | Dominated  | Dominated                        | £50,000           |
| WMP2                        | £135                                   | £788                                      | £923                            | 580,099                        | Ext Dom.                      | Ext Dom.   | Ext Dom.                         | £28,551           |
| Look AHEAD                  | £889                                   | £787                                      | £1,676                          | 580,650                        | Ext Dom.                      | Ext Dom.   | Ext Dom.                         | £185,688          |
| RYGB Surgery                | £1,421                                 | £732                                      | £2,153                          | 592,597                        | £1,269                        | 13,019     | £97,449                          | £81,029           |
| <b>20 year time horizon</b> |                                        |                                           |                                 |                                |                               |            |                                  |                   |
| Baseline                    | £0                                     | £1,732                                    | £1,732                          | 931,620                        | --                            | --         | --                               | --                |
| VLCD added to WMP1          | £220                                   | £1,686                                    | £1,905                          | 943,556                        | Dominated                     | Dominated  | Dominated                        | £14,542           |
| WMP1                        | £94                                    | £1,688                                    | £1,781                          | 943,732                        | £49                           | 12,112     | £4,077                           | £4,077            |
| WMP2                        | £135                                   | £1,679                                    | £1,814                          | 944,768                        | Ext Dom.                      | Ext Dom.   | Ext Dom.                         | £6,233            |
| Look AHEAD                  | £889                                   | £1,660                                    | £2,549                          | 949,072                        | Ext Dom.                      | Ext Dom.   | Ext Dom.                         | £46,854           |
| RYGB Surgery                | £1,767                                 | £1,470                                    | £3,237                          | 1,000,384                      | £1,456                        | 56,652     | £25,697                          | £21,889           |
